# Supplementary material for: Parametric Vine Copula Framework in the Trivariate Probability Analysis of Compound Flooding Events
Source: Preprints.org preprint supplement (doi:10.20944/preprints202206.0259.v1), 2022-06-20
Supplement: Supplementary file 1 [file supplementary]

### Supplementary Tables (STs)

ST 1. Description of 3-D asymmetric (fully nested) Archimedean copula functions and their statistical properties tested in the present study

| Asymmetric 3-D Archimedean copulas                                                                                                                                                                                                      | $C_1(p, q, r)$                                                                                                                                                                                                               | $\phi_2^{-1} \circ \phi_1(\cdot)$                                                        | Conditions                                             |
|-----------------------------------------------------------------------------------------------------------------------------------------------------------------------------------------------------------------------------------------|------------------------------------------------------------------------------------------------------------------------------------------------------------------------------------------------------------------------------|------------------------------------------------------------------------------------------|--------------------------------------------------------|
| Frank                                                                                                                                                                                                                                   | $-\theta_1^{-1} \log \{ 1 - (1 - e^{-\theta_1})^{-1} \left( 1 - \left[ 1 - (1 - e^{-\theta_2})^{-1} (1 - e^{-\theta_2 p}) \cdot (1 - e^{-\theta_2 q}) \right]^{\theta_1/\theta_2} \right) \cdot (1 - e^{-\theta_1 r}) \} \}$ | $-\ln \frac{\{1 + e^{-t}(e^{-\theta_2-1})\}^{\theta_1/\theta_2} - 1}{e^{-\theta_1} - 1}$ | $\theta_1 < \theta_2$ , where $\theta \in (0, \infty)$ |
| Gumbel-Hougaard (G-H)                                                                                                                                                                                                                   | $e^{\left\{ - \left( [(-\log p)^{\theta_2} + (-\log q)^{\theta_2}]^{\theta_1/\theta_2} + (-\log r)^{\theta_1} \right)^{1/\theta_1} \right\}}$                                                                                | $t^{\theta_1/\theta_2}$                                                                  | $\theta_1 < \theta_2$ , where $\theta \in [0, \infty)$ |
| Clayton                                                                                                                                                                                                                                 | $\left[ (p^{-\theta_2} + q^{-\theta_2} - 1)^{\theta_1/\theta_2} + r^{-\theta_1} - 1 \right]^{-1/\theta_1}$                                                                                                                   | $\frac{1}{\theta_1} \{ (\theta_2 t + 1)^{\theta_1/\theta_2} - 1 \}$                      | $\theta_1 < \theta_2$ , where $\theta \in (0, \infty)$ |
| <b>Note:</b> $\theta_1$ & $\theta_2$ represents copula dependence parameters; p, q, r represents univariate marginal CDFs of the triplet flood variable $x_1$ = rain(say), $x_2$ = storm surges (say) & $x_3$ = river discharge (say) . |                                                                                                                                                                                                                              |                                                                                          |                                                        |

ST 2. Statistical descriptions of 2-D parametric copulas in the bivariate joint analysis of flood attribute pairs

| Copula function      | 2-D copula $C_\theta(x_1, x_2)$                                                                                                                   | Parameter range ( $\theta$ )                          | Generating function (or generator) $\phi(t)$                    | Relation of Kendall's $\tau$ and $\theta$ ( $\tau_\theta$ )                                                                                                                                                                                    | Upper tail dependence coefficient measures ( $\lambda_{up}$ ) |
|----------------------|---------------------------------------------------------------------------------------------------------------------------------------------------|-------------------------------------------------------|-----------------------------------------------------------------|------------------------------------------------------------------------------------------------------------------------------------------------------------------------------------------------------------------------------------------------|---------------------------------------------------------------|
| Clayton              | $[\max\{x_1^{-\theta} + x_2^{-\theta} - 1; 0\}]^{-1/\theta}$                                                                                      | $0 \leq \theta < \infty$                              | $\frac{1}{\theta}(t^{-\theta} - 1)$                             | $\frac{\theta}{\theta + 2}$                                                                                                                                                                                                                    | 0                                                             |
| Frank                | $\frac{-1}{\theta} \ln \left( 1 + \frac{(e^{-\theta x_1} - 1)(e^{-\theta x_2} - 1)}{(e^{-\theta} - 1)} \right)$                                   | $-\infty < \theta < \infty$                           | $-\ln \left( \frac{e^{-\theta t} - 1}{e^{-\theta} - 1} \right)$ | $1 + 4 \left( \frac{D_1(-\ln \theta) - 1}{\ln \theta} \right)$<br>where $D_k(x)$ is the Debye function, for any positive integer $k$ ,<br>$D_k(x) = \frac{k}{x^k} \int_0^x t^k / (e^t - 1) dt$<br>(Zhang and Singh 2006 and Wang et al., 2009) | 0                                                             |
| Gumbel-Hougaard (GH) | $\exp \left\{ -[(-\ln(x_1))^\theta + (-\ln(x_2))^\theta]^{1/\theta} \right\}$                                                                     | $1 \leq \theta < \infty$                              | $(-\ln t)^\theta$                                               | $\frac{\theta - 1}{\theta}$                                                                                                                                                                                                                    | $2 - 2^{1/\theta}$                                            |
| Joe                  | $1 - [(1 - x_1)^\theta + (1 - x_2)^\theta - (1 - x_1)^\theta (1 - x_2)^\theta]^{1/\theta}$                                                        | $1 \leq \theta < \infty$                              | $-\ln(1 - (1 - t)^\theta)$                                      |                                                                                                                                                                                                                                                | $2 - 2^{1/\theta}$                                            |
| BB1 (Clayton-Gumbel) | $\left( 1 + [(x_1^{-\theta} - 1)^\delta + (x_2^{-\theta} - 1)^\delta]^{1/\delta} \right)^{-1/\theta}$                                             | $0 < \theta < \infty;$<br>$1 \leq \delta < \infty$    |                                                                 |                                                                                                                                                                                                                                                | $2 - 2^{1/\delta}$                                            |
| BB6 (Joe-Gumbel)     | $1 - \left( 1 - \exp \left[ - \left( (-\ln(1 - x_1)^\theta)^\delta + (-\ln(1 - x_2)^\theta)^\delta \right)^{1/\delta} \right] \right)^{1/\theta}$ | $1 \leq \theta < \infty;$<br>$1 \leq \delta < \infty$ |                                                                 |                                                                                                                                                                                                                                                | $2 - 2^{1/\theta\delta}$                                      |

|                   |                                                                                                                                                             |                                                       |                                                                                 |  |                                                                              |
|-------------------|-------------------------------------------------------------------------------------------------------------------------------------------------------------|-------------------------------------------------------|---------------------------------------------------------------------------------|--|------------------------------------------------------------------------------|
| BB7 (Joe-Clayton) | $\frac{1}{\theta} \left[ 1 - \left( (1 - x_1^\theta)^{-\delta} + (1 - x_2^\theta)^{-\delta} - 1 \right)^{-1/\delta} \right]^{1/\theta}$                     | $1 \leq \theta < \infty;$<br>$0 \leq \delta < \infty$ | $\frac{(1 - (1 - t)^\theta)^{-\delta}}{-1}$                                     |  | $2 - 2^{1/\theta}$                                                           |
| BB8 (Joe-Frank)   | $\frac{1}{\theta} \left( 1 - \left[ 1 - \frac{1}{1 - (1 - \delta)^\theta} (1 - (1 - \delta x_1)^\theta (1 - \delta x_2)^\theta) \right]^{1/\delta} \right)$ | $1 \leq \theta < \infty;$<br>$0 \leq \delta \leq 1$   | $-\ln \left[ \frac{1 - (1 - \delta t)^\theta}{1 - (1 - \delta)^\theta} \right]$ |  | $2 - 2^{1/\theta},$<br>when $\delta = 1$<br>Otherwise,<br>$\lambda_{up} = 0$ |

Note:  $\theta$  is the copula dependence parameter of monoparametric copulas;  $\theta$  &  $\delta$  jointly are the copula dependence parameters for bi-parametric (or 2-parameter) Archimedean copulas such as BB1, BB6, BB7 & BB8

ST 3. Basic descriptive statistics of the targeted compound flooding characteristics

| Compound flood variables           | Descriptive statistics |
|------------------------------------|------------------------|
| Annual maximum 24-hr rainfall (mm) | Min.: 33.00            |
|                                    | 1st Quartile.: 63.42   |
|                                    | Median: 79.50          |
|                                    | Mean: 80.68            |
|                                    | 3rd Quartile.: 93.35   |
|                                    | Max.:146.00            |
|                                    | Min.: -0.1950          |
|                                    | 1st Quartile.: 0.0680  |
|                                    | Median: 0.2380         |

|                                                                              |                       |
|------------------------------------------------------------------------------|-----------------------|
| Maximum storm surge (m) (time interval = $\pm 1$ days)                       | Mean: 0.2269          |
|                                                                              | 3rd Quartile.: 0.3583 |
|                                                                              | Max.: 0.6580          |
| Maximum river discharge (m <sup>3</sup> /sec) (time interval = $\pm 1$ days) | Min.: 760             |
|                                                                              | 1st Quartile.: 1085   |
|                                                                              | Median: 1615          |
|                                                                              | Mean: 1864            |
|                                                                              | 3rd Quartile.: 2162   |
|                                                                              | Max.: 5440            |

ST 4. The autocorrelation (or serial correlation) test using Q-statistics for individual flood characteristics

| Flood variables                                        | Test statistics          | Lag size 30 | Lag size 20 | Lag size 10 | Lag size 5 |
|--------------------------------------------------------|--------------------------|-------------|-------------|-------------|------------|
| Annual maximum 24-hr rainfall (mm)                     | X-squared (Q-statistics) | 23.812      | 13.917      | 5.4392      | 2.6815     |
|                                                        | p-value                  | 0.7804      | 0.8347      | 0.86        | 0.7489     |
| Maximum storm surge (m) (Time interval = $\pm 1$ days) | X-squared (Q-statistics) | 29.54       | 25.836      | 14.499      | 10.403     |

|                                                                                                                                                |                          |                                                                            |                                                                            |                                                                            |                                                                            |
|------------------------------------------------------------------------------------------------------------------------------------------------|--------------------------|----------------------------------------------------------------------------|----------------------------------------------------------------------------|----------------------------------------------------------------------------|----------------------------------------------------------------------------|
|                                                                                                                                                | p-value                  | 0.4894                                                                     | 0.1713                                                                     | 0.1514                                                                     | 0.06459                                                                    |
| Maximum river discharge(m <sup>3</sup> /sec)<br>(Time interval = ±1days)                                                                       | X-squared (Q-statistics) | 24.393                                                                     | 16.899                                                                     | 6.7806                                                                     | 2.3418                                                                     |
|                                                                                                                                                | p-value                  | 0.7539                                                                     | 0.6595                                                                     | 0.746                                                                      | 0.8001                                                                     |
| Critical value                                                                                                                                 |                          | 43.77                                                                      | 31.4104                                                                    | 18.307                                                                     | 11.0705                                                                    |
| Null Hypothesis is $H_0$                                                                                                                       |                          | Accept (5% (0.05) level of significance or 95% (0.95) Confidence interval) | Accept (5% (0.05) level of significance or 95% (0.95) Confidence interval) | Accept (5% (0.05) level of significance or 95% (0.95) Confidence interval) | Accept (5% (0.05) level of significance or 95% (0.95) Confidence interval) |
| Existence of serial correlation within time series of flood characteristics                                                                    |                          | No                                                                         | No                                                                         | No                                                                         | No                                                                         |
| Hypothesis Testing<br>$H_0$ : The data exhibited no serial correlation (or autocorrelation).<br>$H_a$ : The data exhibited serial correlation. |                          |                                                                            |                                                                            |                                                                            |                                                                            |

ST 5. Nonparametric Mann-Kendall (M-K) and modified M-K test for identifying monotonic time trend behavior within individual flood characteristics

| Mann-Kendall (M-K) test |                    |                  |             |   |         | Modified Mann-Kendall (M-K) test |           | Investigation result |              |
|-------------------------|--------------------|------------------|-------------|---|---------|----------------------------------|-----------|----------------------|--------------|
| Flood characteristics   | Calculated Z value | Critical Z value | Sen's slope | S | Var (S) | Corrected $Z_c$                  | Corrected | Null Hypot           | Existence of |

|                                                                             |                                     | (Significance level $\alpha = 0.05 \text{ or } 5\%$ ) |              |              |              |                                       | Variance (V) | hesis $H_0$ | Trend |
|-----------------------------------------------------------------------------|-------------------------------------|-------------------------------------------------------|--------------|--------------|--------------|---------------------------------------|--------------|-------------|-------|
| Annual maximum 24-hr rainfall(m m)                                          | $z = 0.32195$<br>(p-value = 0.7475) | $\pm 1.96$                                            | 7.000000e-02 | 3.500000e+01 | 1.115300e+04 | 3.219460e-01(p-value = 7.474936e-01)  | 1.094507e+03 | Accept      | No    |
| Maximum storm surge (m) (Time interval = $\pm 1$ days)                      | $z = 2.85$<br>(p-value=0.004371)    | $\pm 1.96$                                            | 6.344828e-03 | 3.020000e+02 | 1.115400e+04 | 6.789031e+00 (p-value = 1.128892e-11) | 1.965701e+03 | Reject      | Yes   |
| Maximum river discharge(m <sup>3</sup> /sec) (Time interval = $\pm 1$ days) | $z = -0.45451$<br>(p-value=0.6495)  | $\pm 1.96$                                            | -3.8857143   | -49.000000   | 11153.000000 | -1.1613047 (p-value = 0.2455180)      | 1708.4022259 | Accept      | No    |

Note:

$H_0$  (Null hypothesis) = Time-invariant behavior within time series.

$H_a$  (Alternate hypothesis) = Existence of monotonic time trend behavior within time series

Conclusion: Rejection of Null hypothesis  $H_0$  clearly reveals the existence of monotonic time trend behavior within time series of Maximum Storm Surge (m) (Time interval =  $\pm 1$ days) observations

Where;

Corrected  $Z_c$  = Z statistic after variance Correction; Sen's Slope = Sen's slope

ST 6. Test for homogeneity of selected flood variables

| Flood variables                                                          | Pettitt<br>(Estimated p-value)       | SNHT test                            | Buishand                             | von Neumann                          | Overall conclusion            |
|--------------------------------------------------------------------------|--------------------------------------|--------------------------------------|--------------------------------------|--------------------------------------|-------------------------------|
| Annual Maximum 24-hr Rainfall (mm)                                       | 0.362 > 0.05<br>(significance level) | 0.739 > 0.05<br>(significance level) | 0.747 > 0.05<br>(significance level) | 0.749 > 0.05<br>(significance level) | Time series is homogenous     |
| Storm Surge (m) (Time interval = $\pm 1$ days)                           | 0.167 > 0.05<br>(significance level) | 0.030 < 0.05<br>(significance level) | 0.088 < 0.05<br>(significance level) | 0.032 < 0.05<br>(significance level) | Time series is not homogenous |
| River Discharge (m <sup>3</sup> /sec) (Time interval = $\pm 1$ days)     | 0.777 > 0.05<br>(significance level) | 0.734 > 0.05<br>(significance level) | 0.558 > 0.05<br>(significance level) | 0.315 > 0.05<br>(significance level) | Time series is homogenous     |
| Note: The p-value has been computed using 10000 Monte Carlo simulations. |                                      |                                      |                                      |                                      |                               |

ST 7. Selection of the univariate marginal probability distribution

|                              |                                                                                                                                        | Estimated parameters of the candidate functions                   |                                                        |                                                                   |
|------------------------------|----------------------------------------------------------------------------------------------------------------------------------------|-------------------------------------------------------------------|--------------------------------------------------------|-------------------------------------------------------------------|
| 1-D parametric distributions | Probability density function (PDFs)                                                                                                    | Annual maximum 24-hr Rainfall (mm)                                | Maximum storm surge (m) (Time interval = $\pm 1$ days) | Maximum river discharge (Time interval = $\pm 1$ days)            |
| Gamma                        | $f(x) = \frac{x^{\alpha-1}}{\beta^{\alpha}\Gamma(\alpha)} e^{-\frac{x}{\beta}}$ $\alpha \text{ (shape)} > 0, \beta \text{ (rate)} > 0$ | $\alpha \text{ (shape)} = 11.66$<br>$\beta \text{ (rate)} = 0.14$ | NA                                                     | $\alpha \text{ (shape)} = 3.75$<br>$\beta \text{ (rate)} = 0.002$ |

|                                          |                                                                                                                                                                                                                                                                                                                                                                                                                                                                                                                |                                                                                                                              |                                                                                                                            |                                                                                                                               |
|------------------------------------------|----------------------------------------------------------------------------------------------------------------------------------------------------------------------------------------------------------------------------------------------------------------------------------------------------------------------------------------------------------------------------------------------------------------------------------------------------------------------------------------------------------------|------------------------------------------------------------------------------------------------------------------------------|----------------------------------------------------------------------------------------------------------------------------|-------------------------------------------------------------------------------------------------------------------------------|
| Lognormal                                | $f(x) = \frac{e^{-0.5\left(\frac{\ln(x)-\mu}{\sigma}\right)^2}}{(x)\sigma\sqrt{2\pi}}$ <p><math>\sigma &gt; 0</math> (shape parameter);<br/> <math>\mu</math> (scale parameter);</p>                                                                                                                                                                                                                                                                                                                           | <p>meanlog (<math>\sigma</math> (shape)) = 4.34</p> <p>sdlog (<math>\mu</math> (scale)) = 0.29</p>                           | NA                                                                                                                         | <p>meanlog (<math>\sigma</math> (shape)) = 7.39</p> <p>sdlog (<math>\mu</math> (scale)) = 0.50</p>                            |
| Logistic                                 | $f(x) = \frac{e^{-\frac{(x-\mu)}{s}}}{s(1 + e^{-\frac{(x-\mu)}{s}})^2}$ <p><math>\mu</math> = location, <math>s</math> = scale, <math>x \in (-\infty, \infty)</math></p>                                                                                                                                                                                                                                                                                                                                       | <p><math>\mu</math> (location) = 78.93</p> <p><math>s</math> (scale) = 13.20</p>                                             | <p><math>\mu</math> (location) = 0.001</p> <p><math>s</math> (scale) = 0.098455885 (0.01)</p>                              | <p><math>\mu</math> (location) = 16</p> <p><math>s</math> (scale) = 551.56</p>                                                |
| Weibull                                  | $f(x) = \frac{\alpha}{\beta} \left(\frac{x}{\beta}\right)^{\alpha-1} e^{-\left(\frac{x}{\beta}\right)^\alpha}$ <p><math>\alpha &gt; 0</math> (shape), <math>\beta &gt; 0</math> (scale)</p>                                                                                                                                                                                                                                                                                                                    | <p><math>\alpha</math> (shape) = 3.48</p> <p><math>\beta</math> (scale) = 89.47</p>                                          | NA                                                                                                                         | <p><math>\alpha</math> (shape) = 1.82</p> <p><math>\beta</math> (scale) = 2115.79</p>                                         |
| GEV<br>(Generalized<br>Extreme<br>Value) | $f(x) = \begin{cases} \frac{1}{\sigma} e^{-(1+kz)^{-1/k}(1+kz)^{-1-1/k}} & \text{for } k \neq 0 \\ \frac{1}{\sigma} e^{(-1-e^{-z})} & \text{for } k = 0 \end{cases}$ <p><math>k, \sigma, \mu</math> signifies for shape, scale &amp; their location parameter, such that, <math>\sigma &gt; 0</math> &amp; <math>z \equiv \frac{(x-\mu)}{\sigma}</math></p> <p>Domain : <math>1 + k(x - \mu)/\sigma</math> for <math>k \neq 0</math> &amp; <math>-\infty &lt; x &lt; +\infty</math> for <math>k = 0</math></p> | <p><math>\mu</math> (location) = 70.38</p> <p><math>k</math> (scale) = 20.42</p> <p><math>\sigma</math> (shape) = -0.079</p> | <p><math>\mu</math> (location) = -0.05</p> <p><math>k</math> (scale) = 0.18</p> <p><math>\sigma</math> (shape) = -0.36</p> | <p><math>\mu</math> (location) = 1272.80</p> <p><math>k</math> (scale) = 519.36</p> <p><math>\sigma</math> (shape) = 0.47</p> |
| Gumbel (or<br>Gumbel<br>Max)             | $f(x) = \frac{1}{\sigma} e^{(-z-e^{-z})}, \text{ where } z = \frac{x-\mu}{\sigma}$ <p>Domain: <math>-\infty &lt; x &lt; +\infty</math></p> <p><math>\mu</math> = scale, <math>\sigma &gt; 0</math> = location</p>                                                                                                                                                                                                                                                                                              | <p><math>\sigma</math> (location) = 69.53</p> <p><math>\mu</math> (scale) = 20.09</p>                                        | <p><math>\sigma</math> (location) = -0.08</p> <p><math>\mu</math> (scale) = 0.18</p>                                       | <p><math>\sigma</math> (location) = 1404.26</p> <p><math>\mu</math> (scale) = 674.33</p>                                      |



|                                                                                                                     |                                                                                                                                                                                         |                                                            |                                                                                         |                                                                                                        |
|---------------------------------------------------------------------------------------------------------------------|-----------------------------------------------------------------------------------------------------------------------------------------------------------------------------------------|------------------------------------------------------------|-----------------------------------------------------------------------------------------|--------------------------------------------------------------------------------------------------------|
| Normal<br>(Gaussian)                                                                                                | $f(x) = \frac{1}{\sigma\sqrt{2\pi}} e^{-\frac{1}{2}\left(\frac{x-\mu}{\sigma}\right)^2}$ $\mu \in \mathbb{R} = \text{mean(location)}, \sigma^2 > 0$ $= \text{variance (squared scale)}$ | $\mu \text{ (mean)} = 80.67$ $\sigma \text{ (sd)} = 24.00$ | $\mu \text{ (mean)} = -7.966529\text{e-}19$ $\sigma \text{ (sd)} = 1.726996\text{e-}01$ | $\mu \text{ (mean)} = 1864.391 \text{ (164.3877)}$ $\sigma \text{ (sd)} = 1114.666 \text{ (116.2062)}$ |
| Note: NA indicates the given is not applicable to model storm surges observation due to some of its negative value. |                                                                                                                                                                                         |                                                            |                                                                                         |                                                                                                        |

ST 8. Goodness-of-fit (GOF) test statistics of the fitted univariate distributions

|                                    |                                    | 1-D FITTED PARAMETRIC FAMILY FUNCTION |                                 |                                 |                                 |                                        |                                 |                                   |
|------------------------------------|------------------------------------|---------------------------------------|---------------------------------|---------------------------------|---------------------------------|----------------------------------------|---------------------------------|-----------------------------------|
| Compound flood variables           | Fitness test statistics            | Gamma                                 | Lognormal                       | Logistic                        | Weibull                         | GEV                                    | Gumbel (or Gumbel Max)          | Normal                            |
| Annual maximum 24-hr rainfall (mm) | Kolmogorov-Smirnov statistic (K-S) | D = 0.077, p-value = 0.945            | D = 0.070, p-value = 0.975      | D = 0.069, p-value = 0.979      | D = 0.121, p-value = 0.508      | <b>D = 0.067, p-value = 0.984</b>      | D = 0.074, p-value = 0.959      | D = 0.113, p-value = 0.594        |
|                                    | Anderson-Darling statistic (A-D)   | An = 0.224, p-value = 0.982           | An = 0.198, p-value = 0.990     | An = 0.346, p-value = 0.898     | An = 0.735, p-value = 0.528     | <b>An = 0.192, p-value = 0.992</b>     | An = 0.216, p-value = 0.985     | An = 0.574, p-value = 0.671       |
|                                    | CVM                                | omega2 = 0.02873, p-value = 0.981     | omega2 = 0.027, p-value = 0.984 | omega2 = 0.033, p-value = 0.966 | omega2 = 0.102, p-value = 0.575 | <b>omega2 = 0.025, p-value = 0.988</b> | omega2 = 0.032, p-value = 0.969 | omega2 = 0.077, p-value = 0.711   |
| Maximum storm surge (m) (Time      | Kolmogorov-Smirnov statistic (K-S) | NA                                    | NA                              | D = 0.090, p-value = 0.813      | NA                              | D = 0.097, p-value = 0.732             | D = 0.152, p-value = 0.210      | <b>D = 0.088, p-value = 0.835</b> |

|                                                                                                                                                                                                                                                            |                                    |                                    |                                   |                                    |                                    |                                            |                                    |                                            |
|------------------------------------------------------------------------------------------------------------------------------------------------------------------------------------------------------------------------------------------------------------|------------------------------------|------------------------------------|-----------------------------------|------------------------------------|------------------------------------|--------------------------------------------|------------------------------------|--------------------------------------------|
| interval =<br>±1days)                                                                                                                                                                                                                                      | Anderson-Darling statistic (A-D)   | NA                                 | NA                                | An = 0.401,<br>p-value = 0.847     | NA                                 | An = 0.375,<br>p-value = 0.872             | An = 1.210,<br>p-value = 0.263     | <b>An = 0.362,<br/>p-value = 0.884</b>     |
|                                                                                                                                                                                                                                                            | CVM                                | NA                                 | NA                                | omega2 = 0.067,<br>p-value = 0.768 | NA                                 | omega2 = 0.064,<br>p-value = 0.790         | omega2 = 0.164,<br>p-value = 0.348 | <b>omega2 = 0.056,<br/>p-value = 0.835</b> |
| Maximum river discharge<br>(Time interval = ±1 days)                                                                                                                                                                                                       | Kolmogorov-Smirnov statistic (K-S) | D = 0.144,<br>p-value = 0.292      | D = 0.125,<br>p-value = 0.459     | D = 0.157,<br>p-value = 0.204      | D = 0.142,<br>p-value = 0.307      | <b>D = 0.097,<br/>p-value = 0.777</b>      | D = 0.145,<br>p-value = 0.285      | D = 0.160,<br>p-value = 0.184              |
|                                                                                                                                                                                                                                                            | Anderson-Darling statistic (A-D)   | An = 1.0496,<br>p-value = 0.331    | An = 0.595,<br>p-value = 0.651    | An = 1.587,<br>p-value = 0.157     | An = 1.568,<br>p-value = 0.161     | <b>An = 0.348,<br/>p-value = 0.897</b>     | An = 0.978,<br>p-value = 0.368     | An = 2.644,<br>p-value = 0.041             |
|                                                                                                                                                                                                                                                            | CVM                                | omega2 = 0.140,<br>p-value = 0.419 | omega2 = 0.079,<br>p-value = 0.69 | omega2 = 0.160,<br>p-value = 0.358 | omega2 = 0.212,<br>p-value = 0.245 | <b>omega2 = 0.059,<br/>p-value = 0.817</b> | omega2 = 0.116,<br>p-value = 0.511 | omega2 = 0.395,<br>p-value = 0.074         |
| Note: GEV is selected as the best-fitted distribution for rainfall, normal distribution for storm surge, and GEV for river discharge series. All three selected functions exhibited the minimum value of K-S, A-D and CvM tests (indicated by bold letter) |                                    |                                    |                                   |                                    |                                    |                                            |                                    |                                            |

Commented [SP51]: I do not see bold numbers???????

Commented [MSL2R1]: corrected

ST 9. Estimating copula dependence parameters via maximum pseudo-likelihood (MPL) estimator and their GOF test statistics and tail dependence measures of flood pairs (a) rainfall-storm surge (b) storm surge- river discharge (c) rainfall-river discharge

|                                            |                                      |
|--------------------------------------------|--------------------------------------|
| (a)<br>For flood pair rainfall-storm surge | N = 1000 (No. of bootstrap sampling) |
|--------------------------------------------|--------------------------------------|

| Copula function                                         | Parameter estimates ( $\theta$ ) via MPL                             | $S_n$  | p-value  |
|---------------------------------------------------------|----------------------------------------------------------------------|--------|----------|
| Frank                                                   | 2.049                                                                | 0.0192 | 0.9246   |
| Clayton                                                 | 0.5081                                                               | 0.0241 | 0.5500   |
| Gumbel-Hougaard (GH)                                    | 1.26                                                                 | 0.0222 | 0.6618   |
| Joe                                                     | 1.318                                                                | 0.0376 | 0.1803   |
| BB1 (Clayton-Gumbel copula)                             | $\theta = \text{theta} = 0.3487$ $\delta = \text{delta} = 1.1083$    | 0.0169 | 0.9076   |
| BB6 (Joe – Gumbel copula)                               | $\theta = \text{theta} = 1.000$ ;<br>$\delta = \text{delta} = 1.26$  | 0.0221 | 0.7827   |
| BB7 (Joe- Clayton copula)                               | $\theta = \text{theta} = 1.153$ ;<br>$\delta = \text{delta} = 0.433$ | 0.0168 | 0.9016   |
| BB8 (Joe- Frank copula)                                 | $\theta = \text{theta} = 6$ ;<br>$\delta = \text{delta} = 0.31$      | 0.0207 | 0.8297   |
| Survival Clayton (Rotated Clayton copula by 180 degree) | 0.4277                                                               | 0.0306 | 0.5569   |
| Survival Joe (Rotated Joe copula by 180 degree)         | 1.392                                                                | 0.0295 | 0.5799   |
| Survival Gumbel (Rotated Gumbel copula by 180 degree)   | 1.279                                                                | 0.0195 | 0.8526   |
| Survival BB1 (Rotated BB1 by 180 degrees)               | $\theta = \text{theta} = 0.1035$ ; $\delta = \text{delta} = 1.2308$  | 0.0173 | 0.8986   |
| Survival BB6 (Rotated BB6 by 180 degrees)               | $\theta = \text{theta} = 1$ ; $\delta = \text{delta} = 1.279$        | 0.0195 | 0.8347   |
| Survival BB7 (Rotated BB7 by 180 degrees)               | $\theta = \text{theta} = 1.3020$ ; $\delta = \text{delta} = 0.2423$  | 0.0177 | 0.8786   |
| Survival BB8 (Rotated BB8 by 180 degrees)               | $\theta = \text{theta} = 2.17$ ; $\delta = \text{delta} = 0.79$      | 0.0192 | 0.019209 |

| (b)<br>For flood pair storm surge-river discharge       |                                                                        | N = 1000 (No. of bootstrap sampling) |         |
|---------------------------------------------------------|------------------------------------------------------------------------|--------------------------------------|---------|
| Copula family                                           | Parameter estimates ( $\theta$ )                                       | $S_n$                                | p-value |
| Frank                                                   | 3.689                                                                  | 0.025026                             | 0.5519  |
| Clayton                                                 | 0.8136                                                                 | 0.0501                               | 0.07642 |
| Gumbel-Hougaard (GH)                                    | 1.554                                                                  | 0.0177                               | 0.8497  |
| Joe                                                     | 1.763                                                                  | 0.0280                               | 0.3452  |
| BB1 (Clayton-Gumbel copula)                             | $\theta = \text{theta} = 0.2297$ ;<br>$\delta = \text{delta} = 1.4250$ | 0.0187                               | 0.8596  |
| BB6 (Joe – Gumbel copula)                               | $\theta = \text{theta} = 1.000$<br>$\delta = \text{delta} = 1.554$     | 0.0178                               | 0.8776  |
| BB7 (Joe- Clayton copula)                               | $\theta = \text{theta} = 1.5744$ ;<br>$\delta = \text{delta} = 0.5152$ | 0.0189                               | 0.8177  |
| BB8 (Joe- Frank copula)                                 | $\theta = \text{theta} = 3.8068$ ;<br>$\delta = \text{delta} = 0.6979$ | 0.0198                               | 0.8217  |
| Survival Clayton (Rotated Clayton copula by 180 degree) | 0.9023                                                                 | 0.0248                               | 0.6948  |
| Survival Joe (Rotated Joe copula by 180 degree)         | 1.649                                                                  | 0.0580                               | 0.1683  |
| Survival Gumbel (Rotated Gumbel copula by 180 degree)   | 1.518                                                                  | 0.0317                               | 0.489   |
| Survival BB1 (Rotated BB1 by 180 degrees)               | $\theta = \text{theta} = 0.4843$ ; $\delta = \text{delta} = 1.2712$    | 0.0179                               | 0.8556  |
| Survival BB6 (Rotated BB6 by 180 degrees)               | $\theta = \text{theta} = 1$ ; $\delta = \text{delta} = 1.518$          | 0.0317                               | 0.53    |
| Survival BB7 (Rotated BB7 by 180 degrees)               | $\theta = \text{theta} = 1.367$ ; $\delta = \text{delta} = 0.736$      | 0.0183                               | 0.8576  |

|                                           |                                                           |        |      |
|-------------------------------------------|-----------------------------------------------------------|--------|------|
| Survival BB8 (Rotated BB8 by 180 degrees) | $\theta = \text{theta} = 6; \delta = \text{delta} = 0.48$ | 0.0300 | 0.53 |
|-------------------------------------------|-----------------------------------------------------------|--------|------|

| (c)<br>For flood pair rainfall-river discharge          |                                                                           | N = 1000 (No. of bootstrap sampling) |         |
|---------------------------------------------------------|---------------------------------------------------------------------------|--------------------------------------|---------|
| Copula family                                           | Parameter estimates ( $\theta$ )                                          | $S_n$                                | p-value |
| Frank                                                   | 0.8414                                                                    | 0.0349                               | 0.2293  |
| Clayton                                                 | 0.1276                                                                    | 0.0460                               | 0.2193  |
| Gumbel-Hougaard (GH)                                    | 1.104                                                                     | 0.0324                               | 0.2363  |
| Joe                                                     | 1.156                                                                     | 0.0344                               | 0.2323  |
| BB1 (Clayton-Gumbel copula)                             | $\theta = \text{theta} = 1.665e - 07;$<br>$\delta = \text{delta} = 1.104$ | 0.0568                               | 0.1444  |
| BB6 (Joe – Gumbel copula)                               | $\theta = \text{theta} = 1;$<br>$\delta = \text{delta} = 1.1$             | 0.0332                               | 0.49    |
| BB7 (Joe- Clayton copula)                               | $\theta = \text{theta} = 1.1440 ;$<br>$\delta = \text{delta} = 0.0295$    | 0.0332                               | 0.489   |
| BB8 (Joe- Frank copula)                                 | $\theta = \text{theta} = 1.5413;$<br>$\delta = \text{delta} = 0.7538$     | 0.0529                               | 0.1643  |
| Survival Clayton (Rotated Clayton copula by 180 degree) | 0.2052                                                                    | 0.0320                               | 0.5210  |
| Survival Joe (Rotated Joe copula by 180 degree)         | 1.152                                                                     | 0.0414                               | 0.3701  |
| Survival Gumbel (Rotated Gumbel copula by 180 degree)   | 1.112                                                                     | 0.0349                               | 0.4820  |
| Survival BB1 (Rotated BB1 by 180 degrees)               | $\theta = \text{theta} = 0.1094; \delta = \text{delta} = 1.0676$          | 0.0297                               | 0.5809  |
| Survival BB6 (Rotated BB6 by 180 degrees)               | $\theta = \text{theta} = 1; \delta = \text{delta} = 1.112$                | 0.0349                               | 0.4630  |

|                                           |                                                                  |        |        |
|-------------------------------------------|------------------------------------------------------------------|--------|--------|
| Survival BB7 (Rotated BB7 by 180 degrees) | $\theta = \text{theta} = 1.0957; \delta = \text{delta} = 0.1504$ | 0.0292 | 0.5859 |
| Survival BB8 (Rotated BB8 by 180 degrees) | $\theta = \text{theta} = 6; \delta = \text{delta} = 0.15$        | 0.0352 | 0.501  |

ST 10. Upper tail dependence coefficient (UTDC) measure of selected 2-D copulas

| Flood pairs                                                                                                                                                                                                                                                                                                     | Selected best-fitted 2-D copulas          | Parametric coefficient of upper tail dependence (UTDC), $\lambda_{up}$ | Non-Parametric coefficient of upper tail dependence (or empirical estimates), $\lambda_{up}^{CFG}$ |
|-----------------------------------------------------------------------------------------------------------------------------------------------------------------------------------------------------------------------------------------------------------------------------------------------------------------|-------------------------------------------|------------------------------------------------------------------------|----------------------------------------------------------------------------------------------------|
| Rainfall-Storm surge                                                                                                                                                                                                                                                                                            | BB7 (Joe- Clayton copula)                 | 0.18                                                                   | 0.19                                                                                               |
| Storm surge-River discharge                                                                                                                                                                                                                                                                                     | Gumbel-Hougaard (GH)                      | 0.43                                                                   | 0.34                                                                                               |
| Rainfall-River discharge                                                                                                                                                                                                                                                                                        | Survival BB7 (Rotated BB7 by 180 degrees) | 0.0100                                                                 | 0.11                                                                                               |
| Note: The selected copulas exhibited minimum difference between parametric and nonparametric estimates of upper tail dependence coefficient (where nonparametric or empirical estimates of upper tail dependence $\lambda_{up}^{CFG}$ estimators are suggested by Caperaa et al., 1997 and Frahm et al., 2005). |                                           |                                                                        |                                                                                                    |

ST 11. Fitting 2-D copulas in constructing second Tree-2 of D-vine structure-1 (case 1, when river discharge is a conditioning variable))

| Selecting best-fitted copula in Tree-2, for case 1 (Conditioning variable - Maximum River discharge (Time interval = $\pm 1$ days)) |                                          | Cramer von Mises functional statistics with parametric bootstrap procedure (N = 1000 (No. of bootstrap samples)) |         |
|-------------------------------------------------------------------------------------------------------------------------------------|------------------------------------------|------------------------------------------------------------------------------------------------------------------|---------|
| Copula function                                                                                                                     | Parameter estimates ( $\theta$ ) via MPL | $S_n$                                                                                                            | p-value |
| Clayton                                                                                                                             | 0.3688                                   | 0.013216                                                                                                         | 0.9456  |
| Gumbel-Hougaard (GH)                                                                                                                | 1.137                                    | 0.03482                                                                                                          | 0.1533  |
| Frank                                                                                                                               | 1.793                                    | 0.024211                                                                                                         | 0.6738  |

|                                                                                                                                                                                                                                               |                                                                      |          |         |
|-----------------------------------------------------------------------------------------------------------------------------------------------------------------------------------------------------------------------------------------------|----------------------------------------------------------------------|----------|---------|
| Joe                                                                                                                                                                                                                                           | 1.083                                                                | 0.06362  | 0.01349 |
| BB1 (Clayton-Gumbel copula)                                                                                                                                                                                                                   | $\theta = \text{theta} = 0.3688; \delta = \text{delta} = 1$          | 0.032113 | 0.527   |
| BB6 (Joe – Gumbel copula)                                                                                                                                                                                                                     | $\theta = \text{theta} = 1; \delta = \text{delta} = 1.135$           | 0.051557 | 0.2622  |
| BB7 (Joe- Clayton copula)                                                                                                                                                                                                                     | $\theta = \text{theta} = 1; \delta = \text{delta} = 0.3691$          | 0.032081 | 0.511   |
| BB8 (Joe- Frank copula)                                                                                                                                                                                                                       | $\theta = \text{theta} = 6; \delta = \text{delta} = 0.26$            | 0.033576 | 0.492   |
| Survival Clayton (Rotated Clayton copula by 180 degree)                                                                                                                                                                                       | 0.1633                                                               | 0.06925  | 0.1154  |
| Survival Joe (Rotated Joe copula by 180 degree)                                                                                                                                                                                               | 1.283                                                                | 0.037065 | 0.4191  |
| Survival Gumbel (Rotated Gumbel copula by 180 degree)                                                                                                                                                                                         | 1.195                                                                | 0.031274 | 0.537   |
| Survival BB1 (Rotated BB1 by 180 degrees)                                                                                                                                                                                                     | $\theta = \text{theta} = 5.436e - 08; \delta = \text{delta} = 1.195$ | 0.031274 | 0.5669  |
| Survival BB6 (Rotated BB6 by 180 degrees)                                                                                                                                                                                                     | $\theta = \text{theta} = 1; \delta = \text{delta} = 1.195$           | 0.031274 | 0.526   |
| Survival BB7 (Rotated BB7 by 180 degrees)                                                                                                                                                                                                     | $\theta = \text{theta} = 1.279787; \delta = \text{delta} = 0.008032$ | 0.036663 | 0.4441  |
| Survival BB8 (Rotated BB8 by 180 degrees)                                                                                                                                                                                                     | $\theta = \text{theta} = 1.7693; \delta = \text{delta} = 0.8966$     | 0.0197   | 0.8387  |
| Note: Clayton copula (minimum value of $S_n$ goodness-of-fit test statistics with p-value greater than 0.05) is identified as the most parsimonious 2-D copula in deriving the bivariate joint probability relationship in Tree-2 for case 1. |                                                                      |          |         |

ST 12. Fitting 2-D copulas in the second Tree-2 of the D-vine structure-2 (case 2, when storm surge is a conditioning variable)

|                                                                                                                                 |                                                                                                                  |
|---------------------------------------------------------------------------------------------------------------------------------|------------------------------------------------------------------------------------------------------------------|
| Selecting best-fitted copula in Tree-2, for case 2 (Conditioning variable - Maximum storm surge (Time interval = $\pm 1$ days)) | Cramer von Mises functional statistics with parametric bootstrap procedure (N = 1000 (No. of bootstrap samples)) |
|---------------------------------------------------------------------------------------------------------------------------------|------------------------------------------------------------------------------------------------------------------|

| Copula function                                                                                                                                                                                                                                            | Parameter estimates ( $\theta$ ) via MPL                                                                    | $S_n$    | p-value |
|------------------------------------------------------------------------------------------------------------------------------------------------------------------------------------------------------------------------------------------------------------|-------------------------------------------------------------------------------------------------------------|----------|---------|
| Rotated Joe 90 degrees                                                                                                                                                                                                                                     | -1.116                                                                                                      | 0.037336 | 0.4301  |
| Rotated Gumbel 90 degrees                                                                                                                                                                                                                                  | -1.076                                                                                                      | 0.039112 | 0.3871  |
| Frank                                                                                                                                                                                                                                                      | -0.5235                                                                                                     | 0.041928 | 0.1014  |
| Gaussian (or Normal)                                                                                                                                                                                                                                       | -0.08233                                                                                                    | 0.043431 | 0.1823  |
| Rotated BB1 90 degrees                                                                                                                                                                                                                                     | $\theta = \text{theta} = \text{par} = -2.020\text{e-}08$<br>$\delta = \text{delta} = \text{par2} = -1.076$  | 0.039112 | 0.4191  |
| Rotated BB6 90 degrees                                                                                                                                                                                                                                     | $\theta = \text{theta} = \text{par} = -1.11, \delta =$<br>$\text{delta} = \text{par2} = -1$                 | 0.036546 | 0.4271  |
| Rotated BB7 90 degrees                                                                                                                                                                                                                                     | $\theta = \text{theta} = \text{par} = -1.117; \delta =$<br>$\text{delta} = \text{par2} = -4.870\text{e-}08$ | 0.037469 | 0.4001  |
| Rotated BB8 90 degrees                                                                                                                                                                                                                                     | $\theta = \text{theta} = \text{par} = -1.1901 \delta =$<br>$\text{delta} = \text{par2} = -0.9672$           | 0.042311 | 0.3821  |
| Rotated BB1 270 degrees                                                                                                                                                                                                                                    | $\theta = \text{theta} = \text{par} = -0.1157 \delta =$<br>$\text{delta} = \text{par2} = -1.0324$           | 0.042865 | 0.3492  |
| Rotated BB6 270 degrees                                                                                                                                                                                                                                    | $\theta = \text{theta} = \text{par} = -1$<br>$\delta = \text{delta} = \text{par2} = -1.07$                  | 0.036776 | 0.4131  |
| Rotated BB7 270 degrees                                                                                                                                                                                                                                    | $\theta = \text{theta} = \text{par} = -1.0518$<br>$\delta = \text{delta} = \text{par2} = -0.1287$           | 0.042953 | 0.3472  |
| Rotated BB8 270 degrees                                                                                                                                                                                                                                    | $\theta = \text{theta} = \text{par} = -1.083$<br>$\delta = \text{delta} = \text{par2} = -1.000$             | 0.031903 | 0.525   |
| Note: Rotated BB8 270 degrees (minimum value of $S_n$ goodness-of-fit test statistics with p-value greater than 0.05) is identified as the most parsimonious 2-D copula in deriving the bivariate joint probability relationship in the Tree-2 for case 2. |                                                                                                             |          |         |

ST 13. Fitting 2-D copulas in the second Tree-2 of the D-vine structure-2 (case 3, when rainfall is a conditioning variable)



| Selecting best-fitted copula in Tree-2, for case 3 (Conditioning variable - Annual maximum 24-hr rainfall) as center) |                                                                     | Cramer von Mises functional statistics with parametric bootstrap procedure (N = 1000 (No. of bootstrap samples)) |         |
|-----------------------------------------------------------------------------------------------------------------------|---------------------------------------------------------------------|------------------------------------------------------------------------------------------------------------------|---------|
| Copula function                                                                                                       | Parameter estimates ( $\theta$ ) via MPL                            | $S_n$                                                                                                            | p-value |
| Clayton                                                                                                               | 0.5898                                                              | 0.058732                                                                                                         | 0.03846 |
| Gumbel-Hougaard (GH)                                                                                                  | 1.506                                                               | 0.027761                                                                                                         | 0.3062  |
| Frank                                                                                                                 | 3.689                                                               | 0.020912                                                                                                         | 0.7897  |
| Joe                                                                                                                   | 1.688                                                               | 0.053483                                                                                                         | 0.03147 |
| BB1 (Clayton-Gumbel copula)                                                                                           | $\theta = \text{theta} = 0.1497$ ; $\delta = \text{delta} = 1.4002$ | 0.034008                                                                                                         | 0.4471  |
| BB6 (Joe – Gumbel copula)                                                                                             | $\theta = \text{theta} = 1$ ; $\delta = \text{delta} = 1.506$       | 0.032806                                                                                                         | 0.468   |
| BB7 (Joe- Clayton copula)                                                                                             | $\theta = \text{theta} = 1.4865$ ; $\delta = \text{delta} = 0.3679$ | 0.043757                                                                                                         | 0.3252  |
| BB8 (Joe- Frank copula)                                                                                               | $\theta = \text{theta} = 6$ ; $\delta = \text{delta} = 0.5$         | 0.022662                                                                                                         | 0.7348  |
| Survival Clayton (Rotated Clayton copula by 180 degree)                                                               | 0.8046                                                              | 0.051335                                                                                                         | 0.2143  |
| Survival Joe (Rotated Joe copula by 180 degree)                                                                       | 1.467                                                               | 0.10204                                                                                                          | 0.03147 |
| Survival Gumbel (Rotated Gumbel copula by 180 degree)                                                                 | 1.406                                                               | 0.056986                                                                                                         | 0.1783  |
| Survival BB1 (Rotated BB1 by 180 degrees)                                                                             | $\theta = \text{theta} = 0.4547$ ; $\delta = \text{delta} = 1.2104$ | 0.036916                                                                                                         | 0.3931  |
| Survival BB6 (Rotated BB6 by 180 degrees)                                                                             | $\theta = \text{theta} = 1$ ; $\delta = \text{delta} = 1.406$       | 0.056986                                                                                                         | 0.1643  |
| Survival BB7 (Rotated BB7 by 180 degrees)                                                                             | $\theta = \text{theta} = 1.2198$ ; $\delta = \text{delta} = 0.6657$ | 0.043056                                                                                                         | 0.2892  |

|                                                                                                                                                                                                                                             |                                               |          |       |
|---------------------------------------------------------------------------------------------------------------------------------------------------------------------------------------------------------------------------------------------|-----------------------------------------------|----------|-------|
| Survival BB8 (Rotated BB8 by 180 degrees)                                                                                                                                                                                                   | $\theta = \theta = 6; \delta = \delta = 0.48$ | 0.031583 | 0.509 |
| Note: Frank copula (minimum value of $S_n$ goodness-of-fit test statistics with p-value greater than 0.05) is identified as the most parsimonious 2-D copula in deriving the bivariate joint probability relationship in Tree-2 for case 3. |                                               |          |       |

Supplementary Figures (SFs)

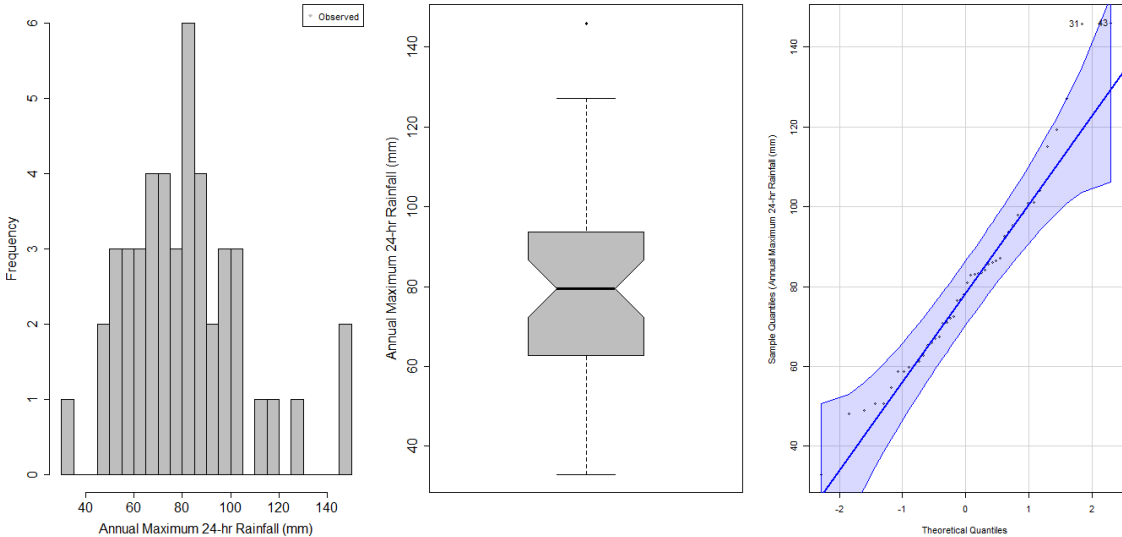

(a)

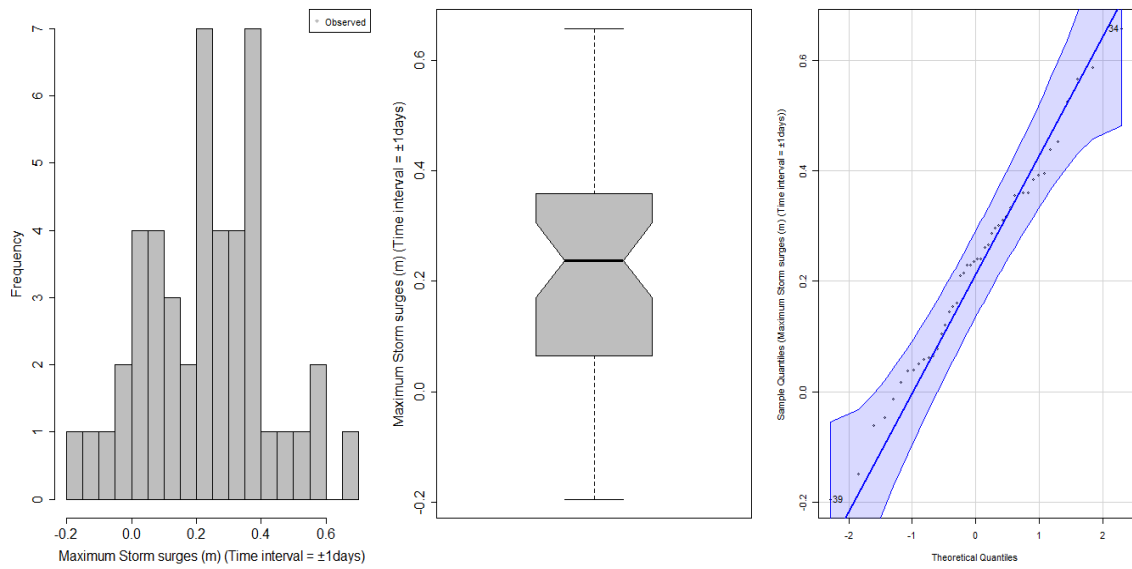

(b)

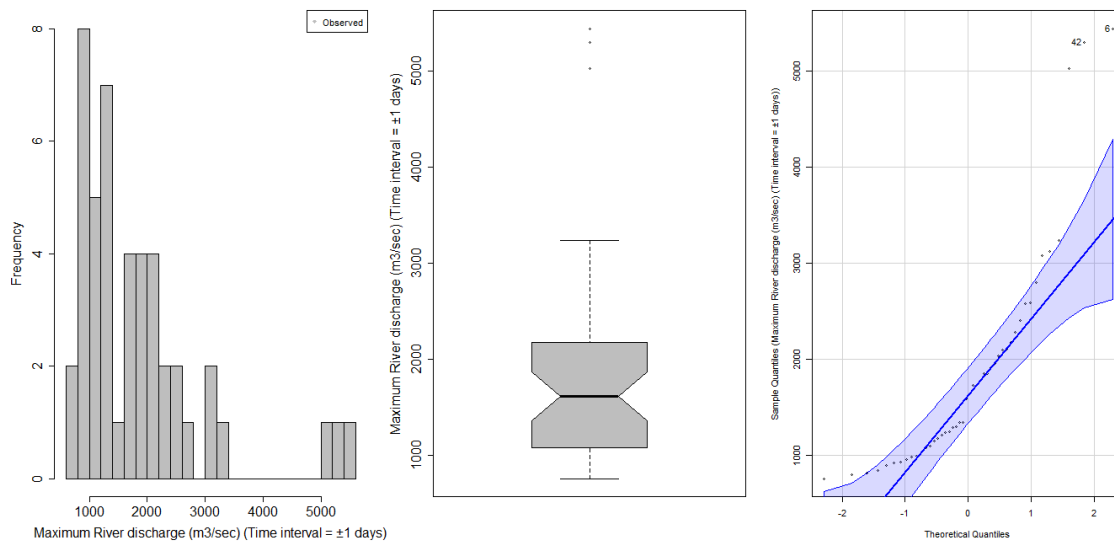

(c)

SF 1. Histogram plot, Box plot and Normal Q-Q (quantile-quantile) plot of selected flood characteristics (a) rainfall (R) (b) storm surges (SS) (c) river discharges (RD)

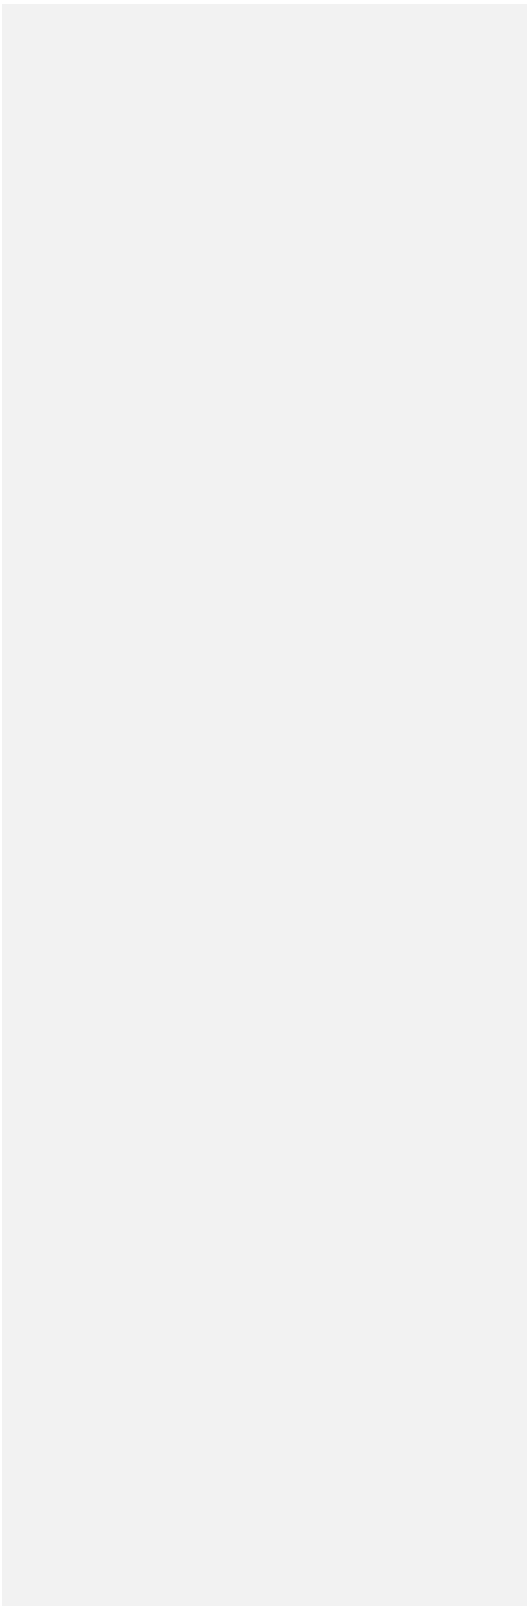

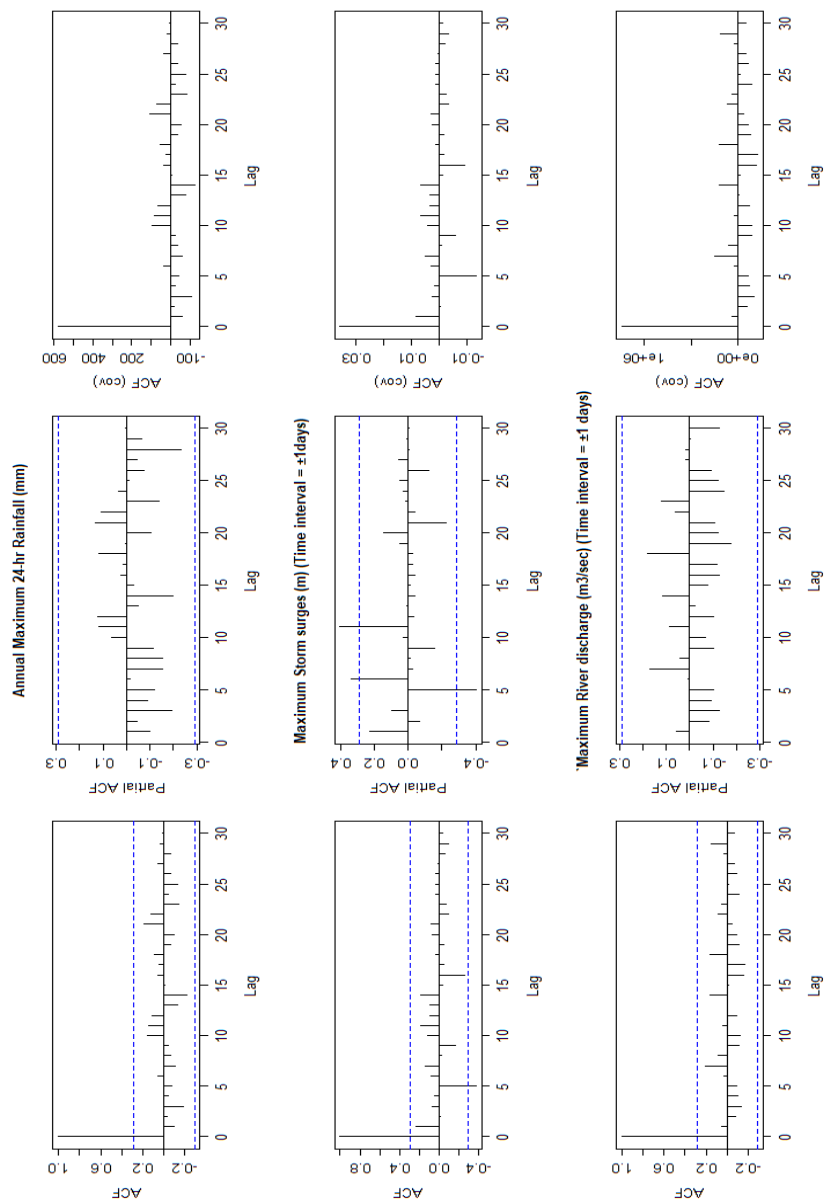

SF 2. Autocorrelation function (ACF) and partial ACF plots under different lag size

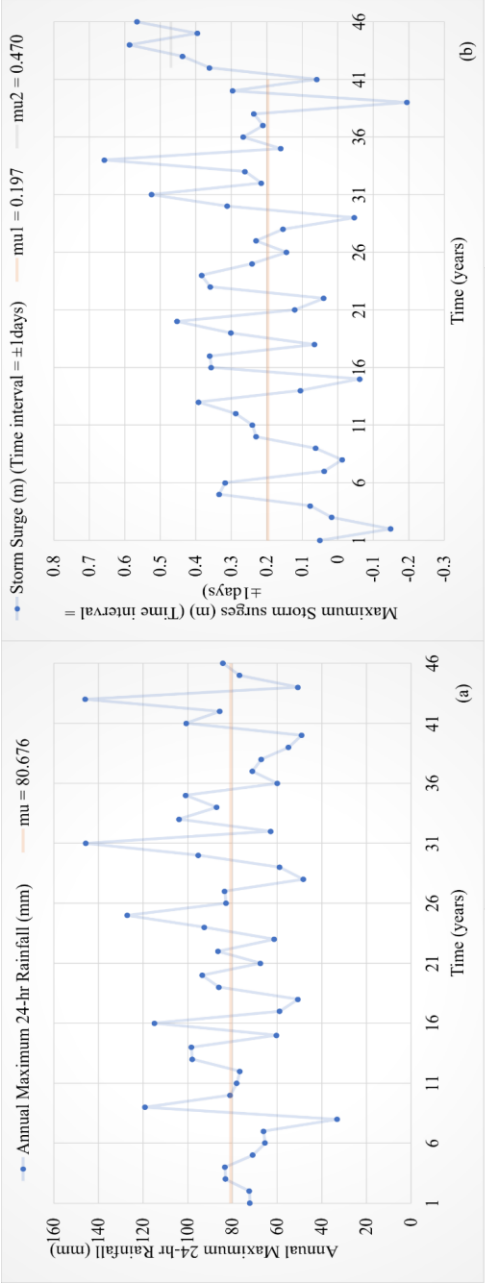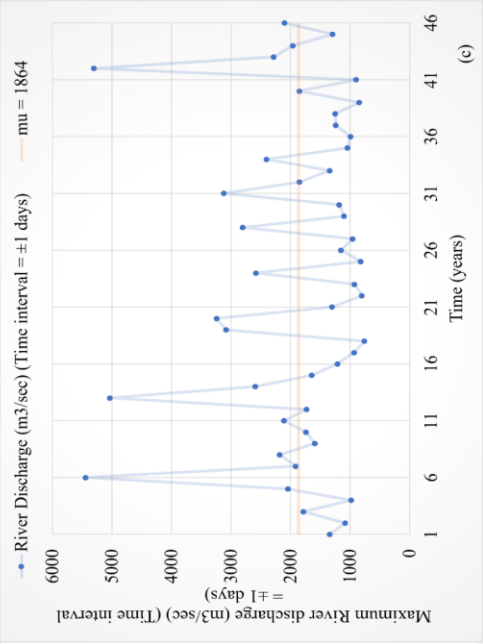

SF 3. Behavior of time series (a) annual maximum 24-hr rainfall (b) maximum storm surge (time interval =  $\pm 1$  days) (c) maximum river discharge (time interval =  $\pm 1$  days) [Note: Figure SF (b) indicates that time series of storm surge is not homogenous at two different times].

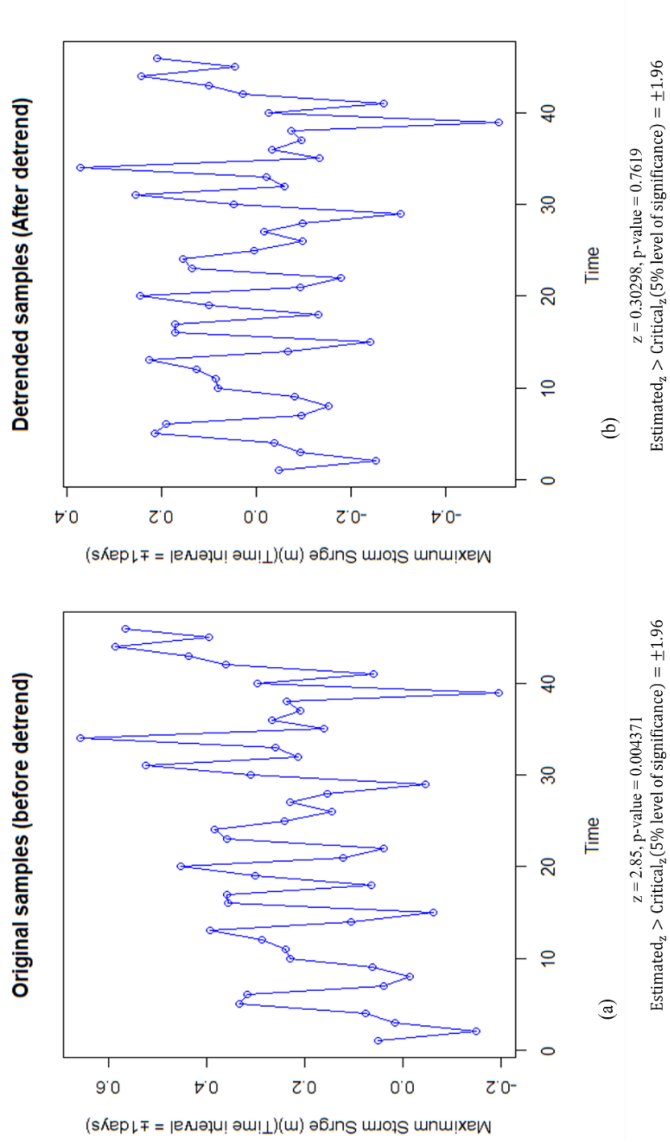

SF 4. Detrending or Prewhitening of the storm surge observations to remove time-trend behavior

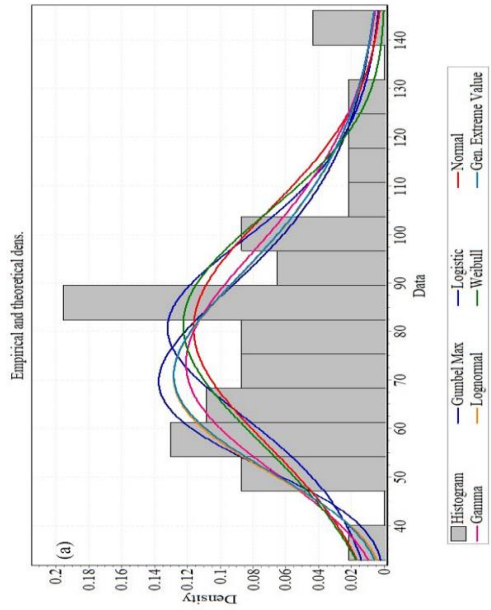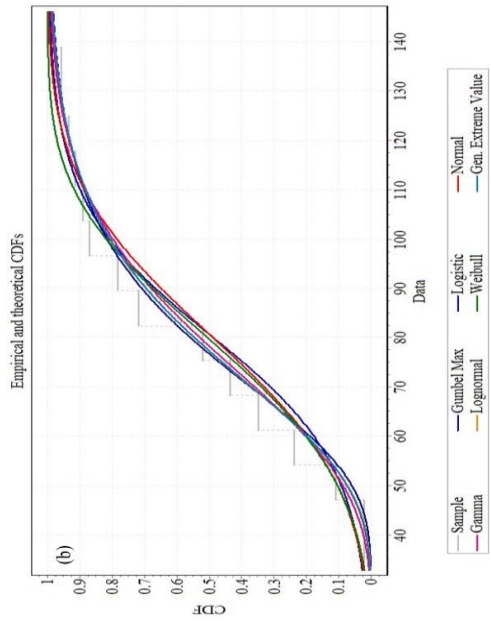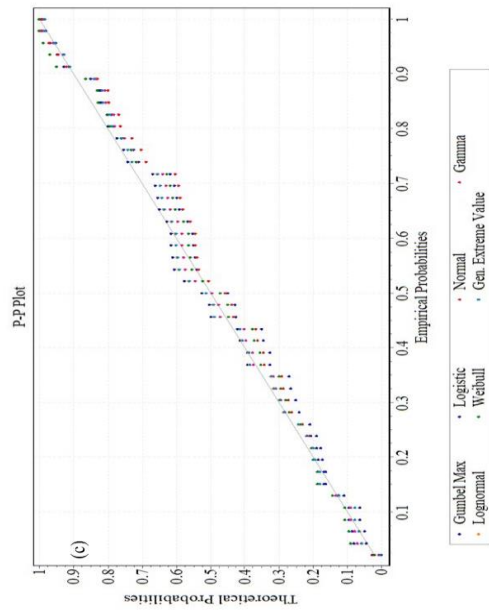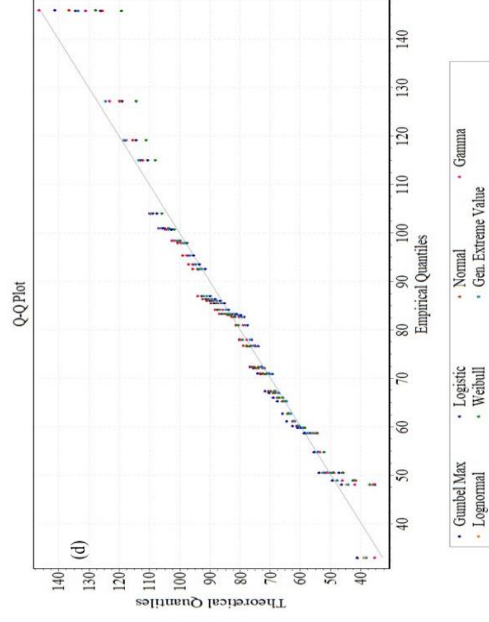

(a)



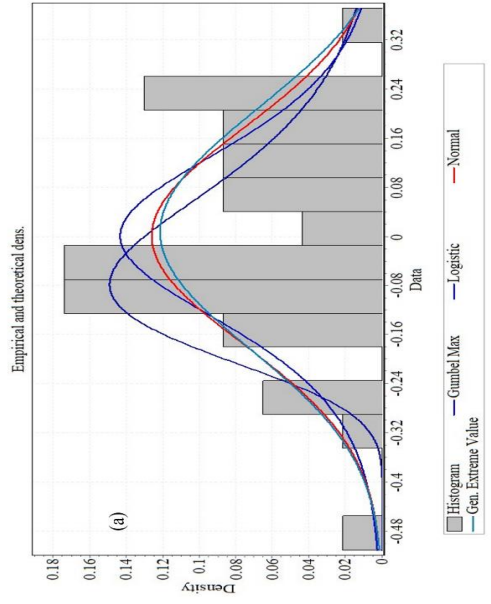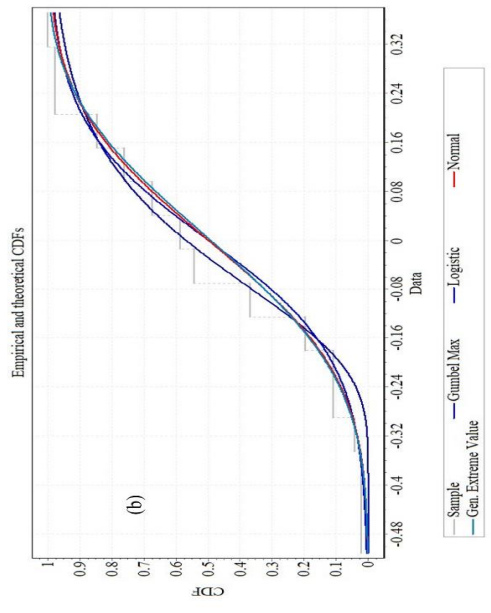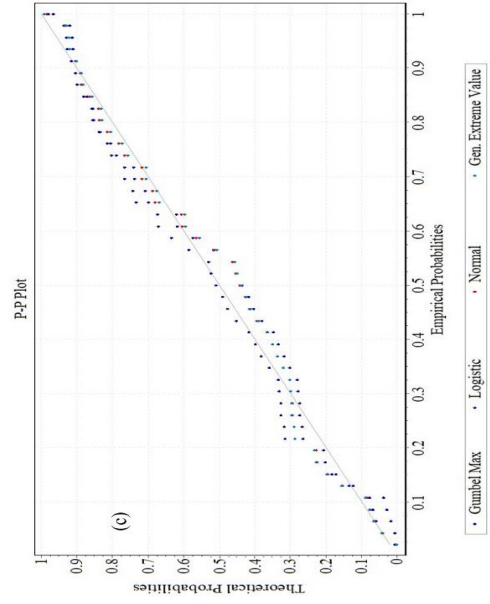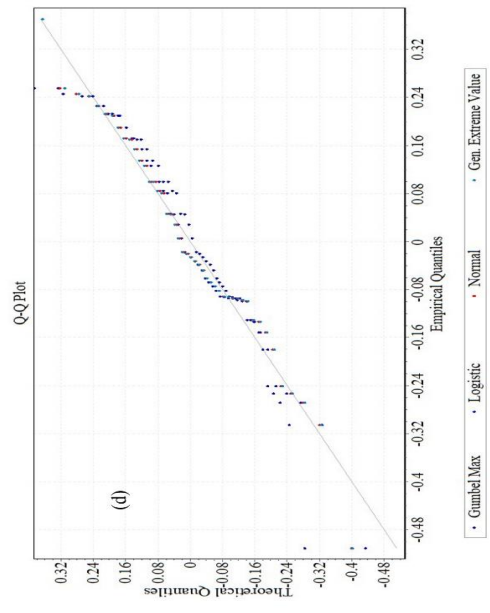

(b)

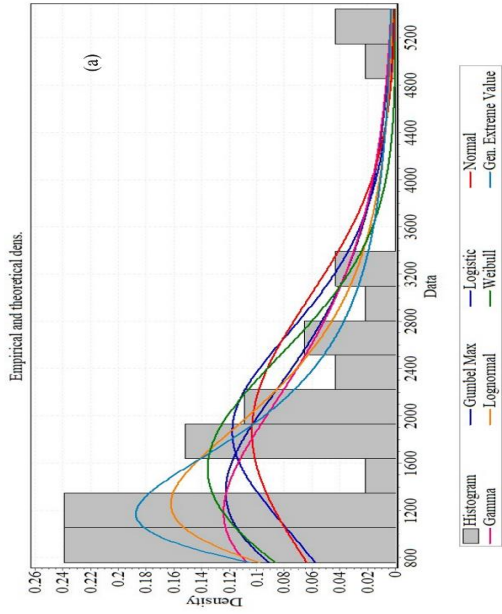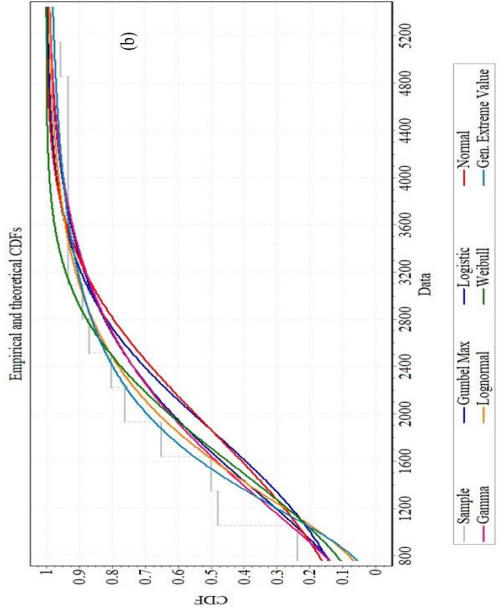

(c)

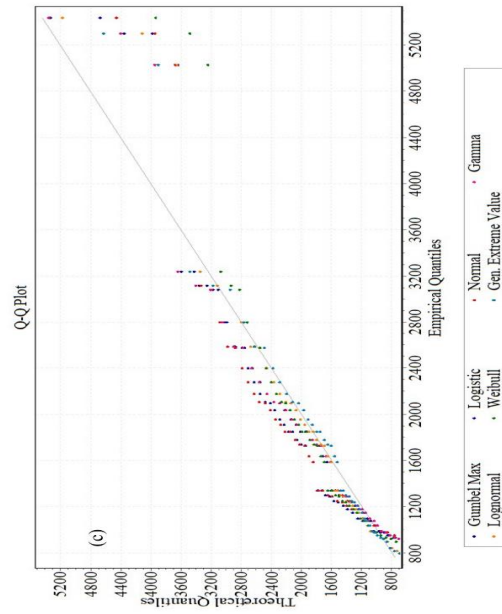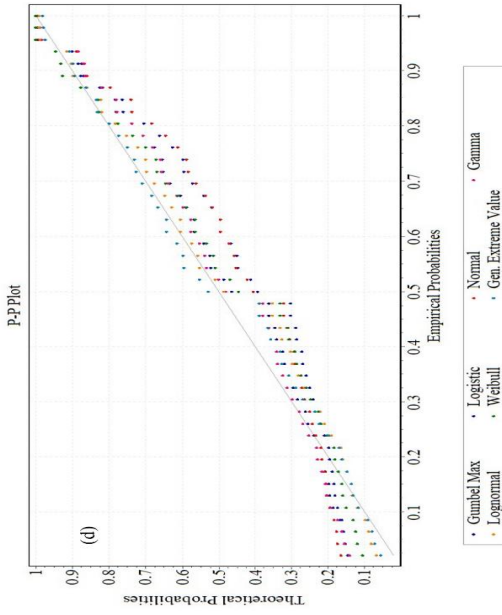

SF 5. Probability density function (PDF), cumulative distribution functions (CDF), quantile-quantile (Q-Q), and probability-probability (P-P) plot of candidate functions fitted to (a) rainfall (b) storm surge (c) river discharge series

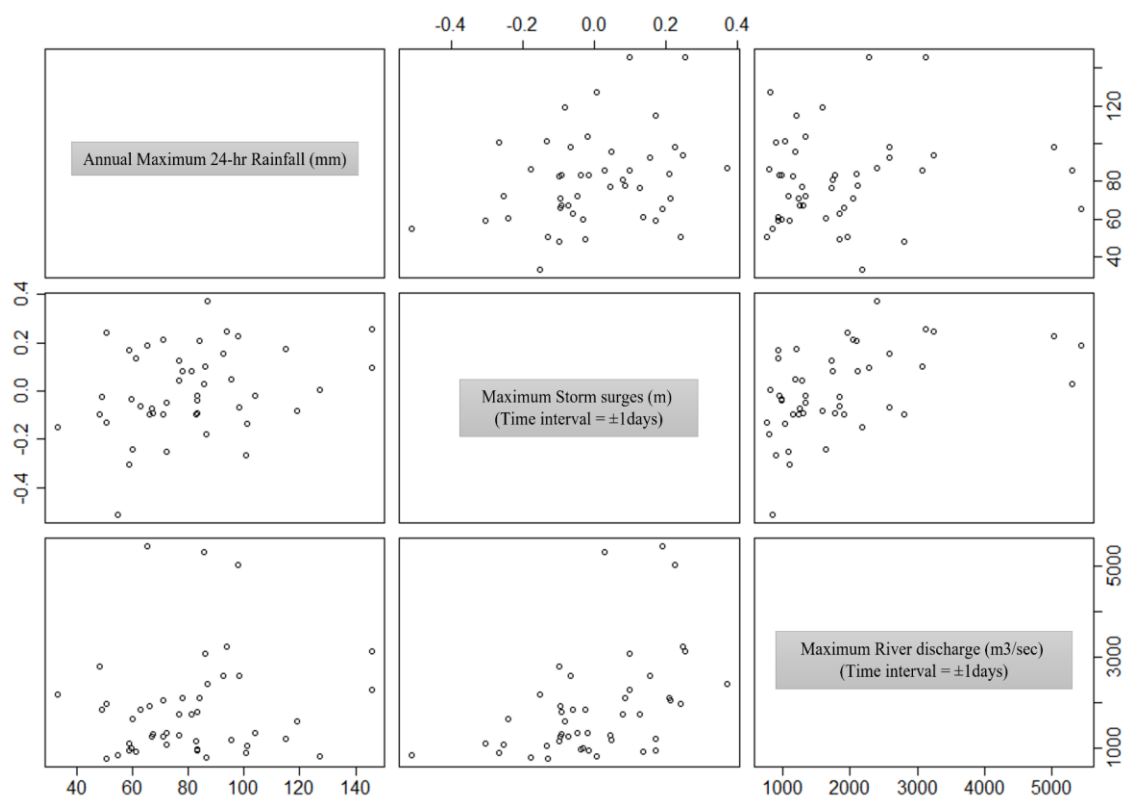

SF 6. 3-D scatterplot of selected flood characteristics

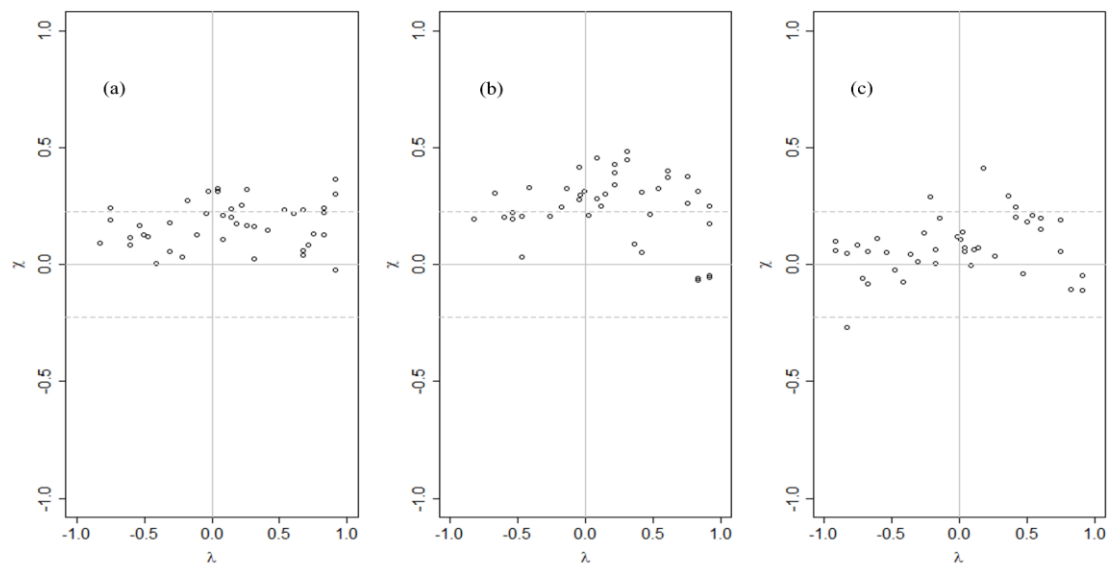

SF 7. Chi-plot between (a) rainfall (R)-storm surge (SS) (b) storm surge (SS)-river discharge (RD) (c) rainfall (R)-river discharge (RD)

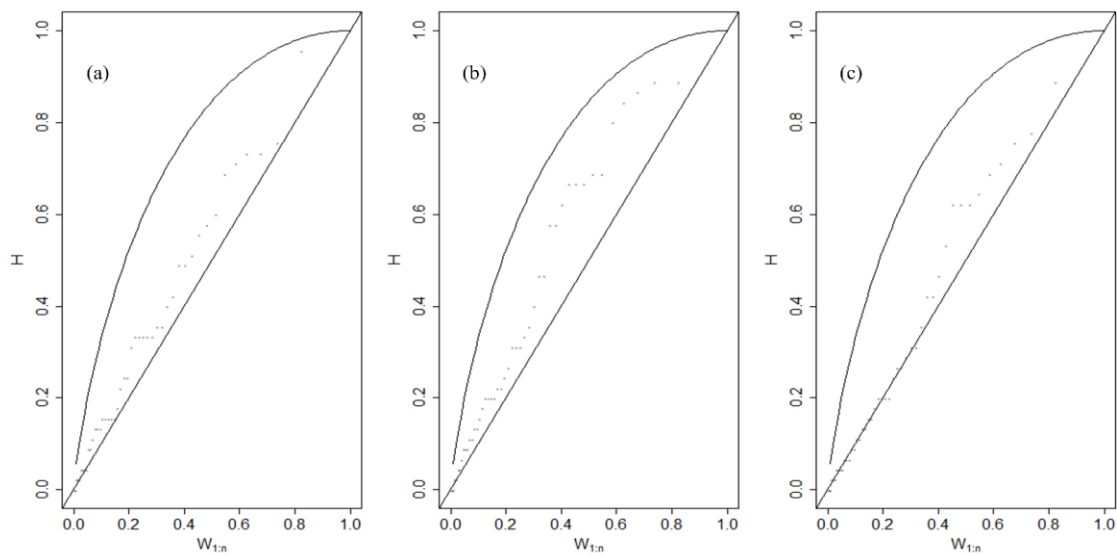

SF 8. Kendall's (K) plot between (a) rainfall (R) -storm surge (SS) (b) storm surge (SS) - river discharge (RD) (c) rainfall (R)-river discharge (RD)

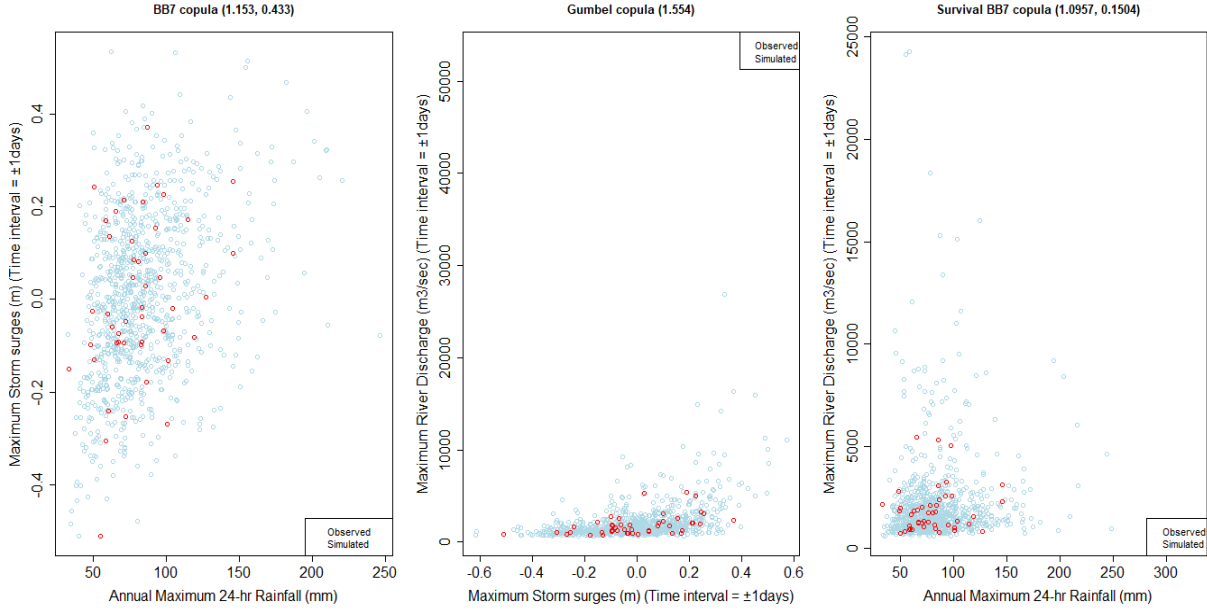

SF 9. Overlapped 2-D scatterplot between observed and theoretical (sample size N=1000, obtained from best-fitted 2-D copulas, refer to ST 9 (a-c)) flood characteristics

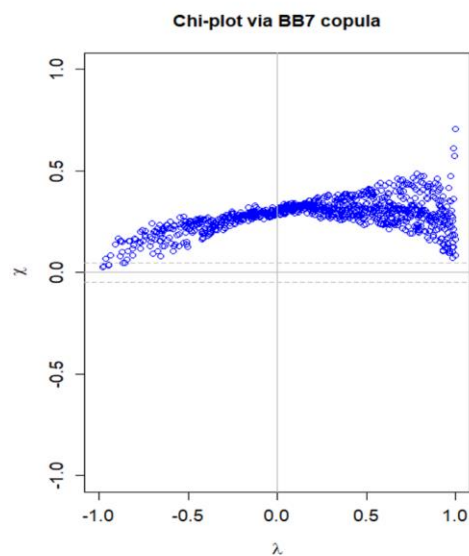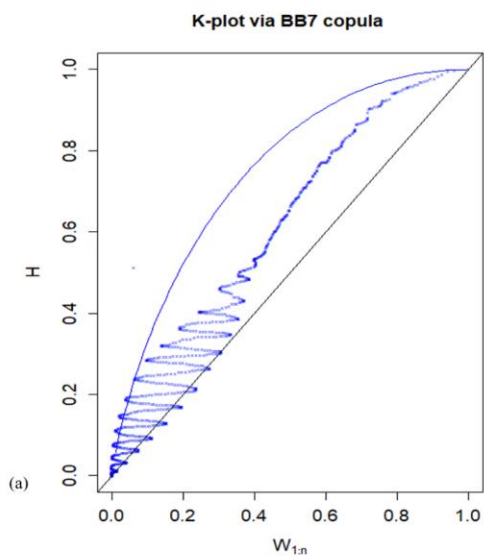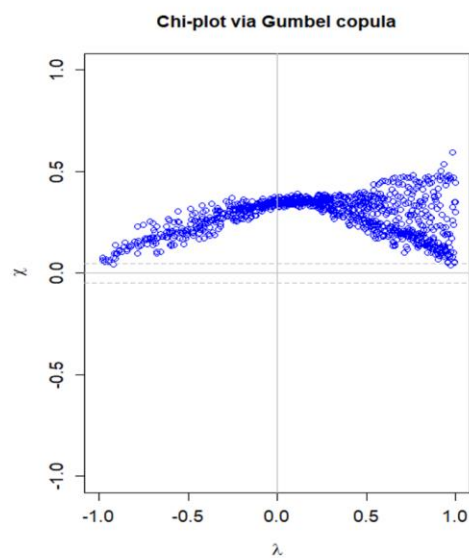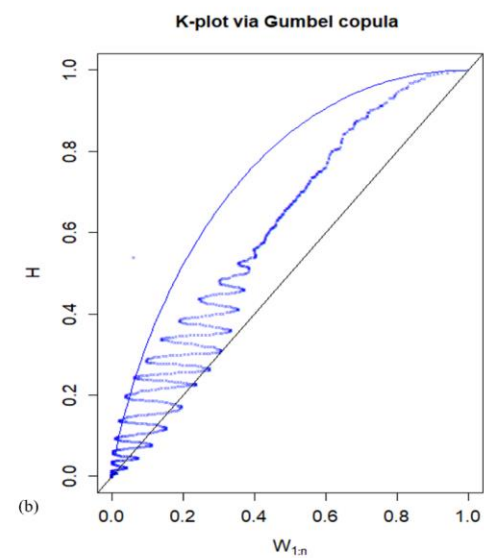

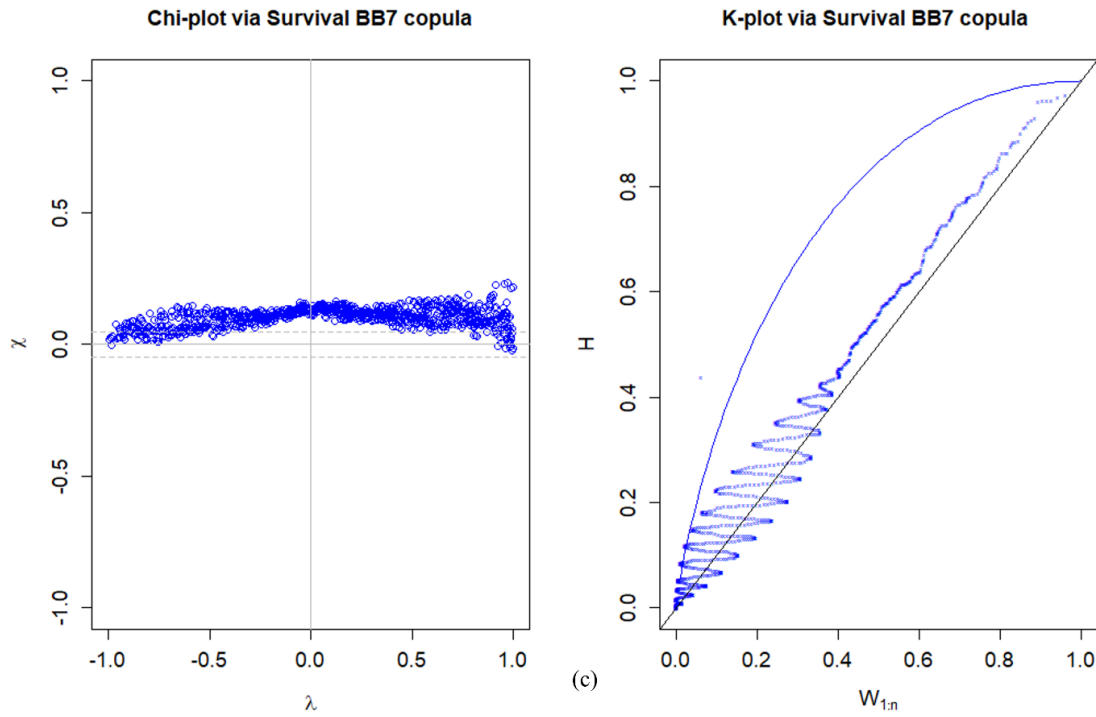

SF 10. Chi-plot and Kendall's (K) plot drawn using random sample (sample size,  $N=1000$ ) simulated from the best fitted 2-copulas (refer to ST 9(a-c)) fitted to for flood pairs (a) Annual maximum 24-hr rainfall - Maximum storm surge (Time interval =  $\pm 1$  days) (b) Maximum storm surge (Time interval =  $\pm 1$  days) - Maximum river discharge (Time interval =  $\pm 1$  days) (c) Annual maximum 24-hr rainfall - Maximum river discharge (Time interval =  $\pm 1$  days).

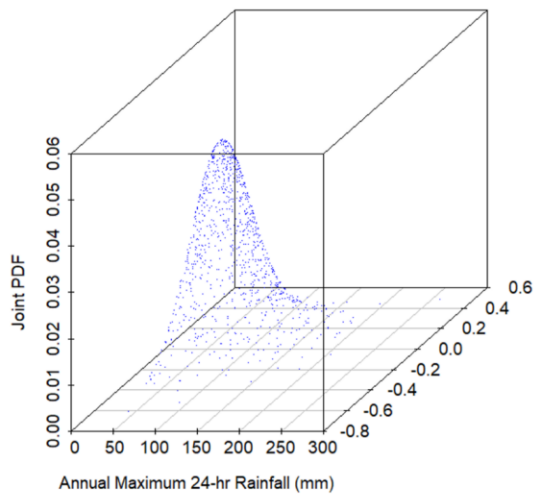

(a)

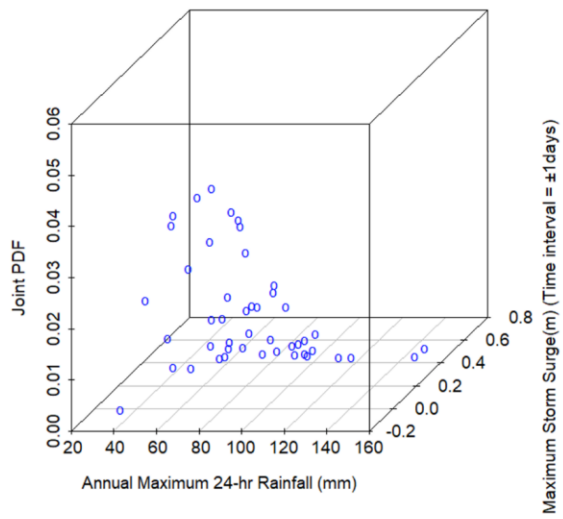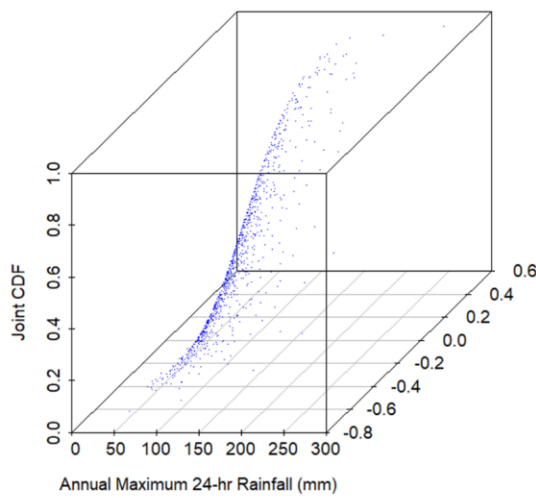

(b)

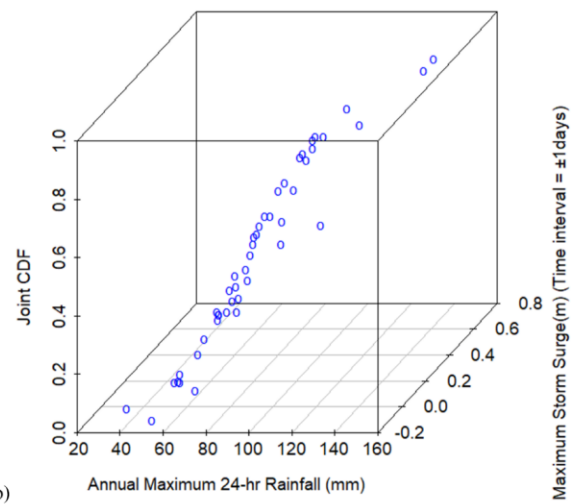



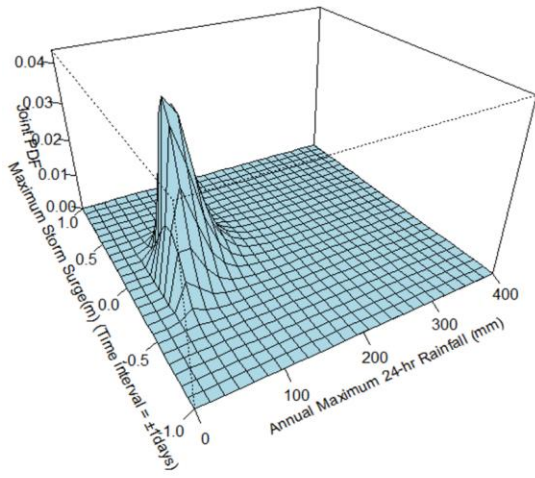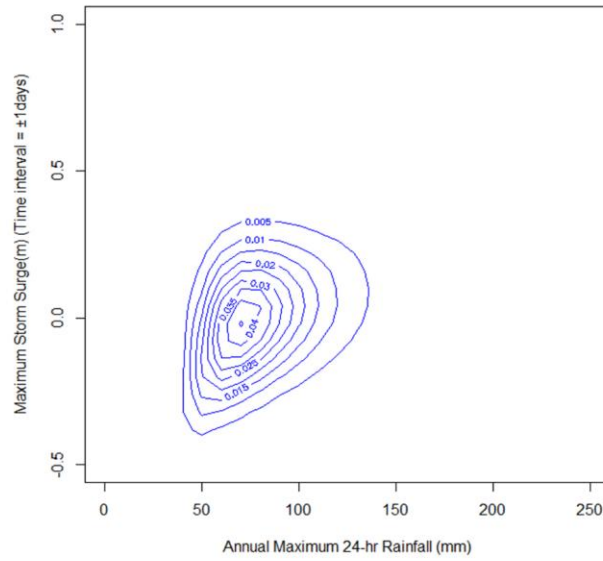

(c)

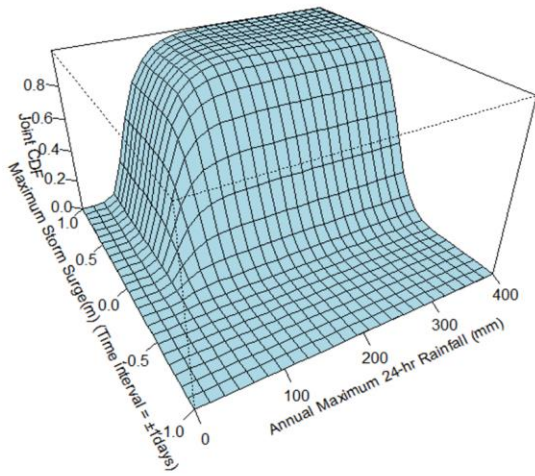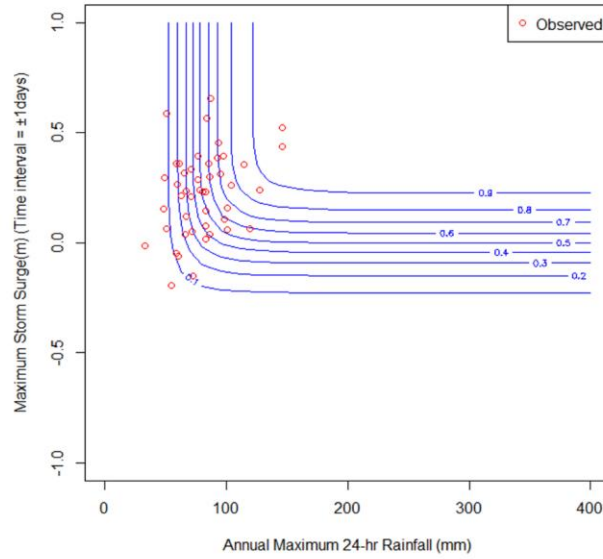

(d)

SF 11. Graphical illustration of the best-fitted BB7 copula in modeling dependence structure of the flood pair Annual maximum 24-hr rainfall (R) - Maximum storm surge (Time interval =  $\pm 1$  days) (SS) via (a) 3-D scatterplot of the joint probability density functions (JPDF) plots (b) 3-D scatterplots of the joint cumulative

distribution functions (JCDF) plots (c) 3-D perspective plots of JCDF and their contour plot (d) 3-D perspective plot of JCDF and their contour plot

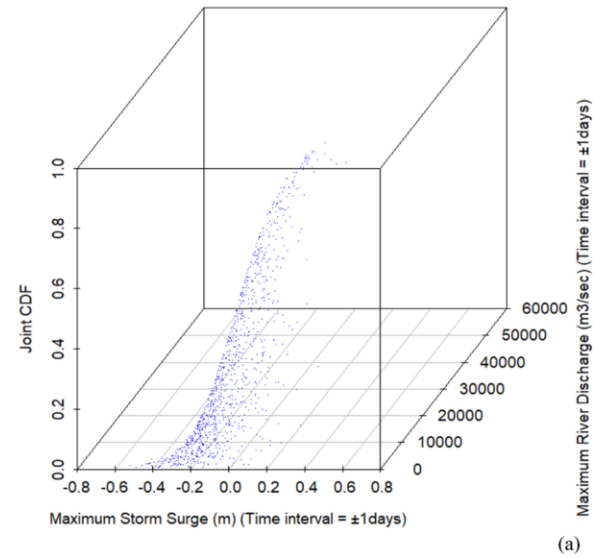

(a)

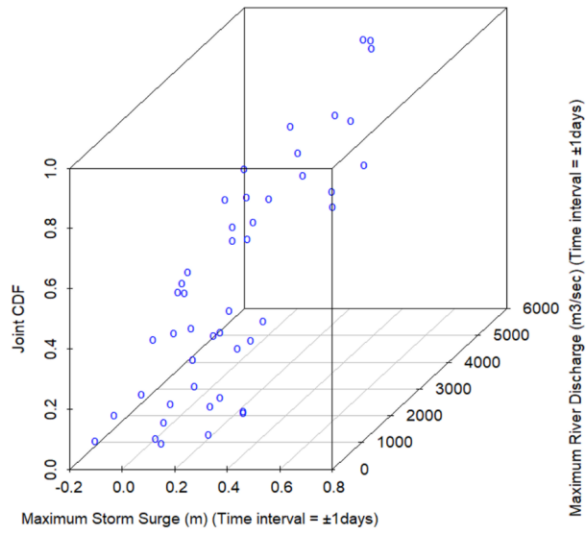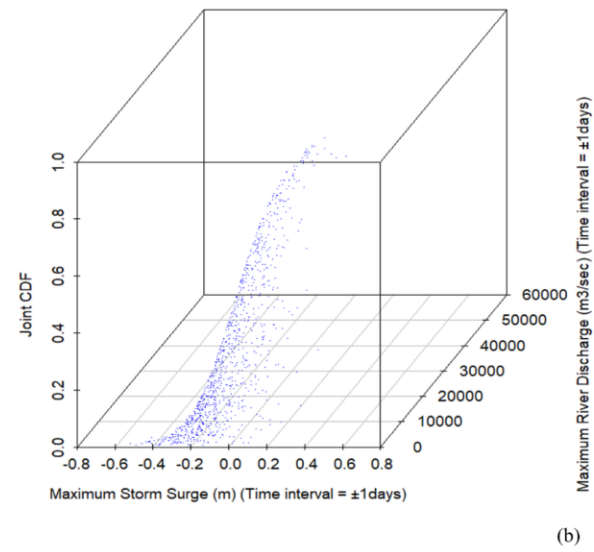

(b)

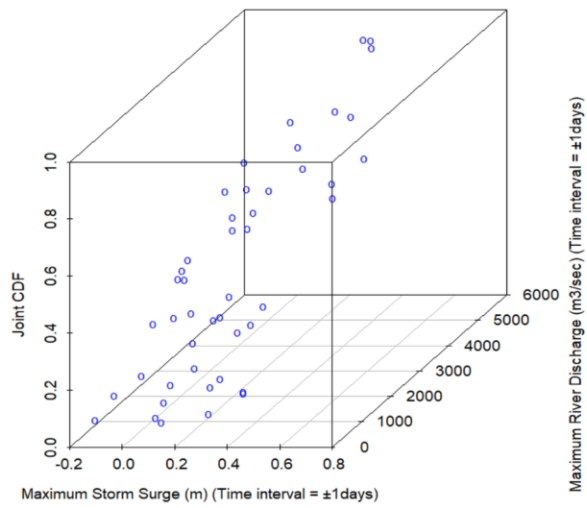



3-D scatterplots of joint cumulative distribution functions (JCDF) plots (c) 3-D perspective plots of JCDF and their contour plot (d) 3-D perspective plot of JCDF and their contour plot

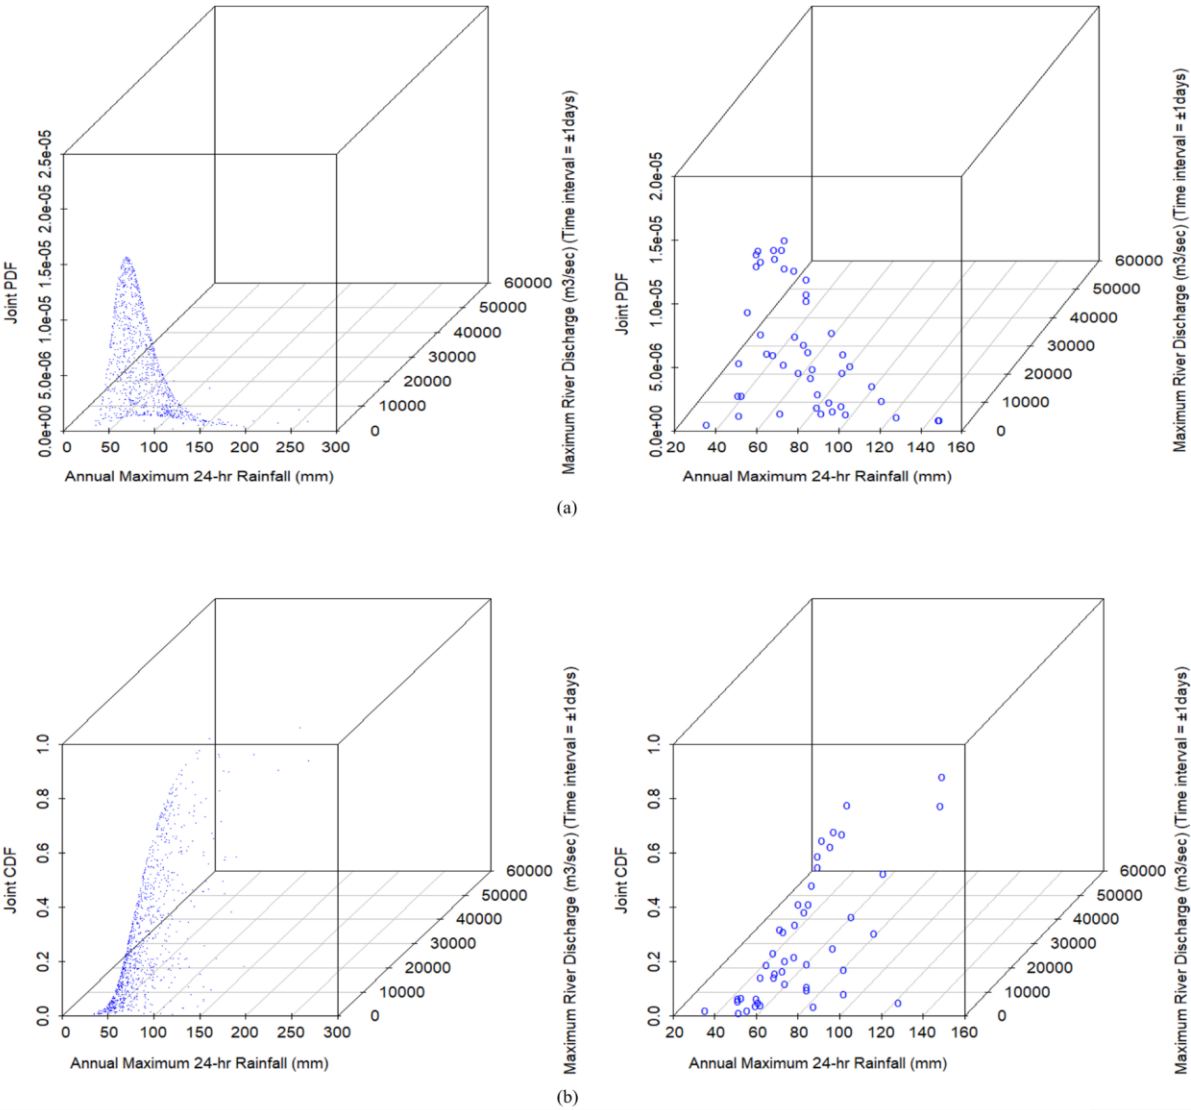

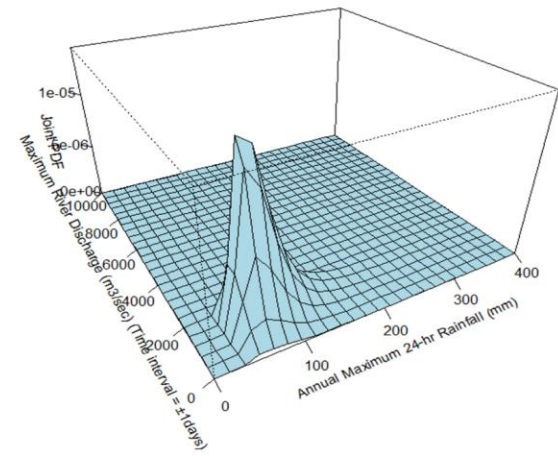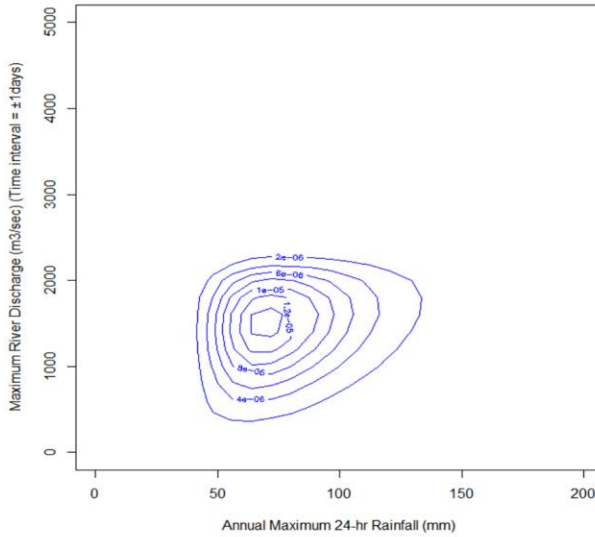

(c)

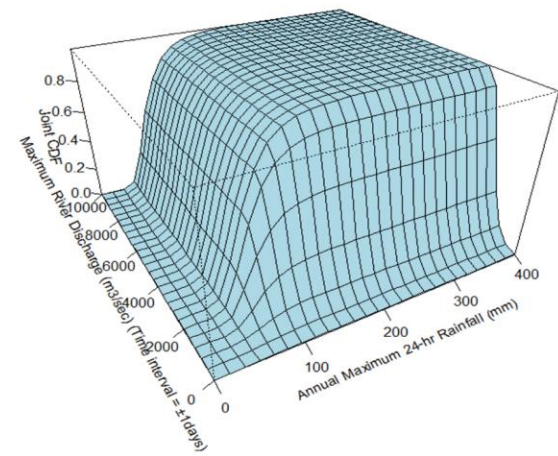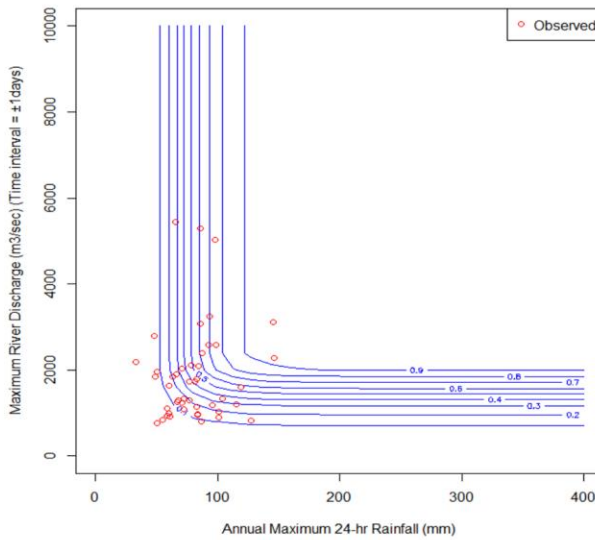

(d)

SF 13. Graphical illustration of best-fitted Survival BB7 copula in modeling dependence structure of the flood pair Annual maximum 24-hr rainfall (R) - Maximum River discharge (Time interval =  $\pm 1$  days) (RD) via (a) 3-D scatterplot of joint probability density functions (JPDF) plots (b) 3-D scatterplots of joint cumulative distribution functions (JCDF) plots (c) 3-D perspective plots of JCDF and their contour plot (d) 3-D perspective plot of JCDF and their contour plot

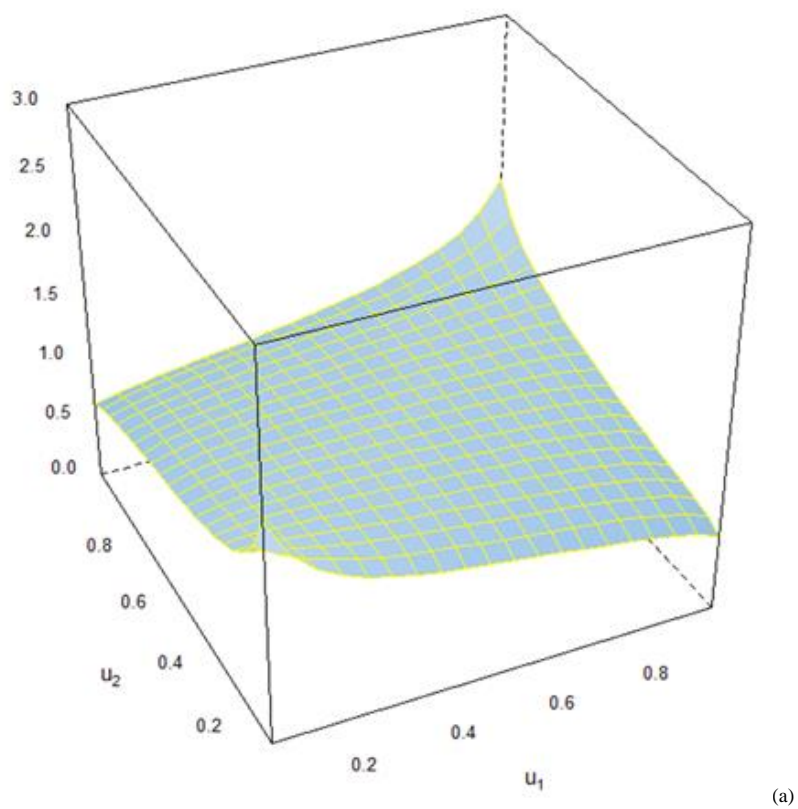

(a)

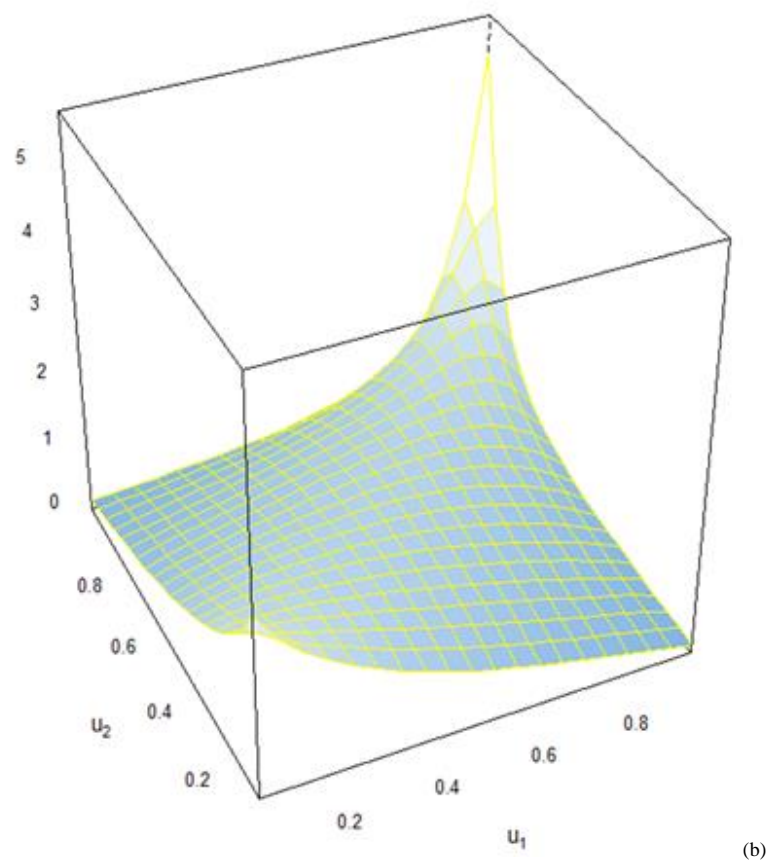

(b)



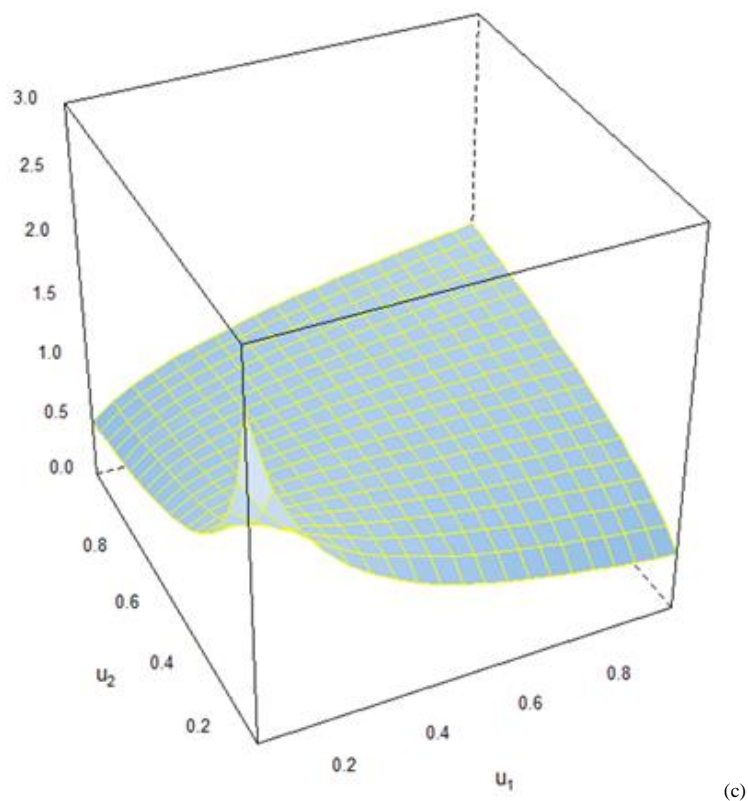

(c)

SF 14. Graphical illustration of the joint density of 2-D copulas families in the construction of 3-D D-vine copula structure-1 (case-1) (a) Survival BB7 copula fitted in Tree-1 (between rainfall ( $u_1$ ) and river discharge ( $u_2$ )) (b) Gumbel copula fitted in Tree-1 (between storm surge ( $u_1$ ) and river discharge ( $u_2$ )) (c) Clayton copula fitted in Tree-2 (between rainfall and storm surge conditional to river discharge)

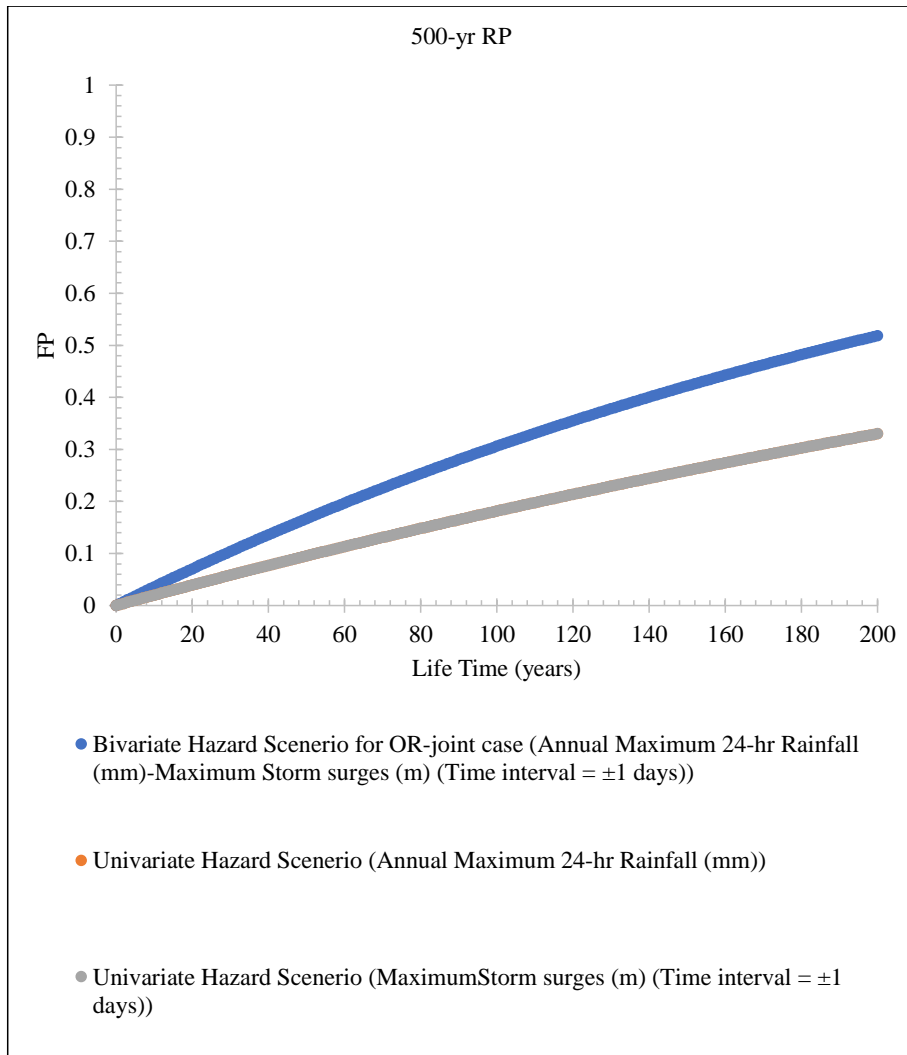

(a)

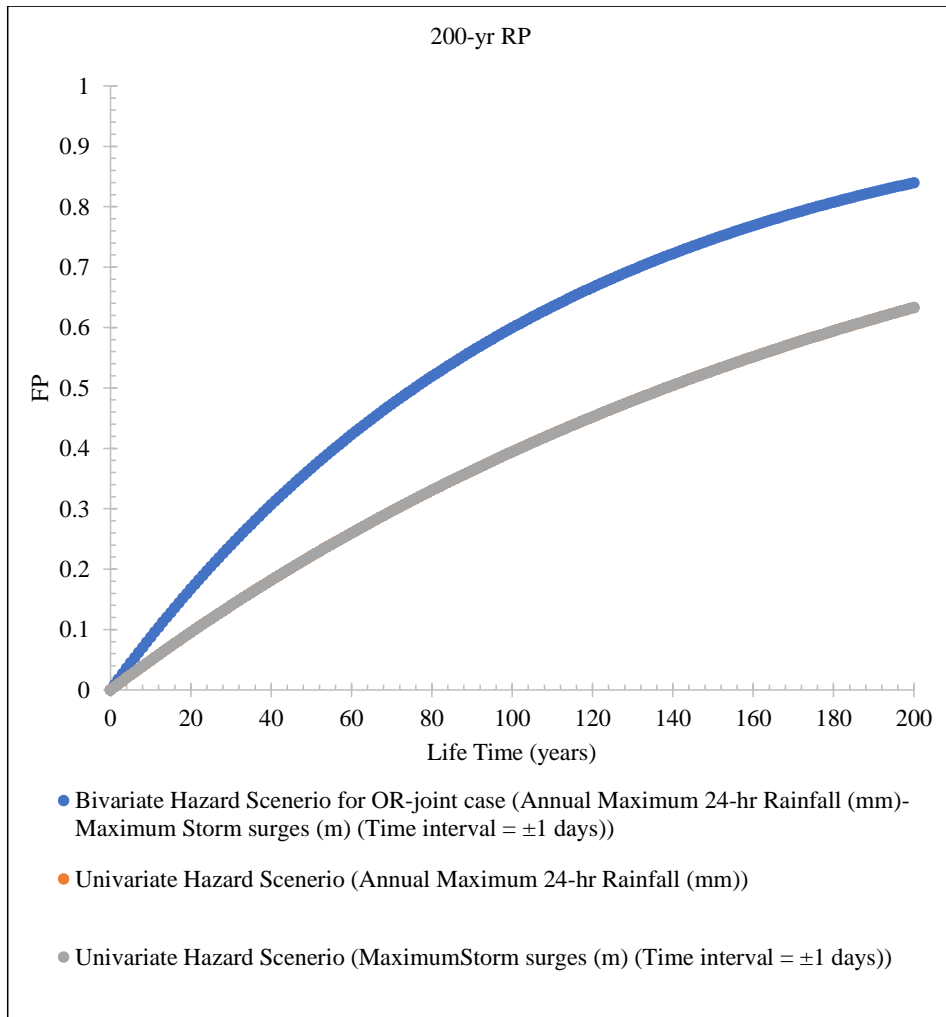

(b)

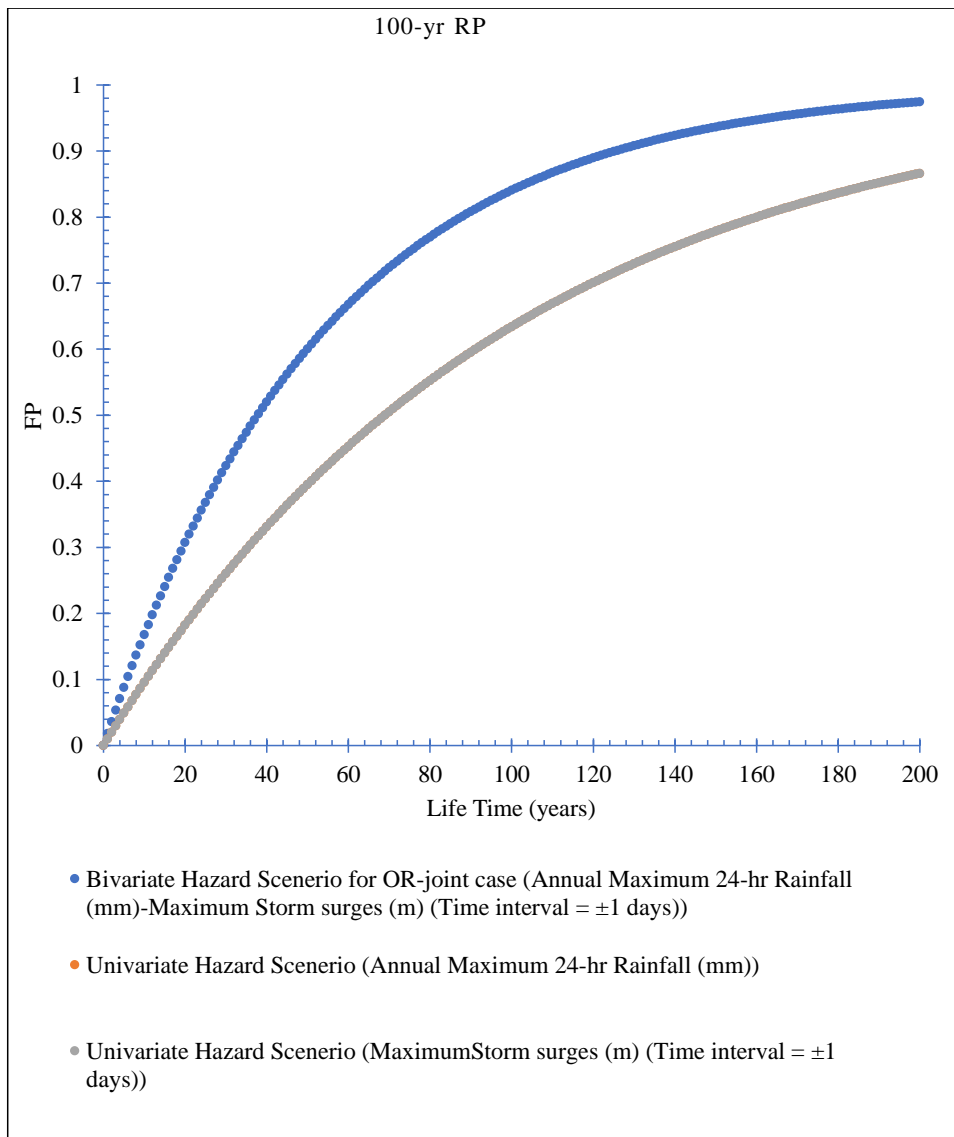

(c)

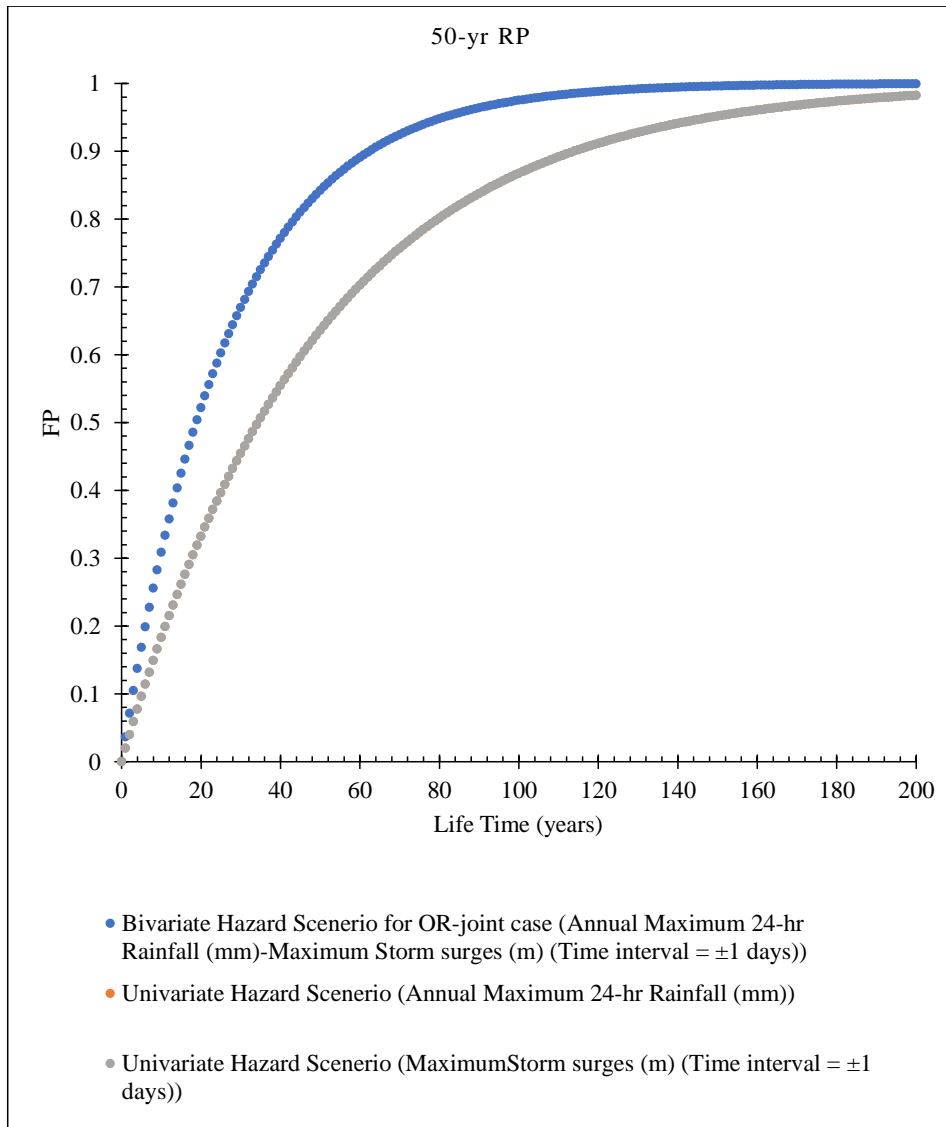

(d)

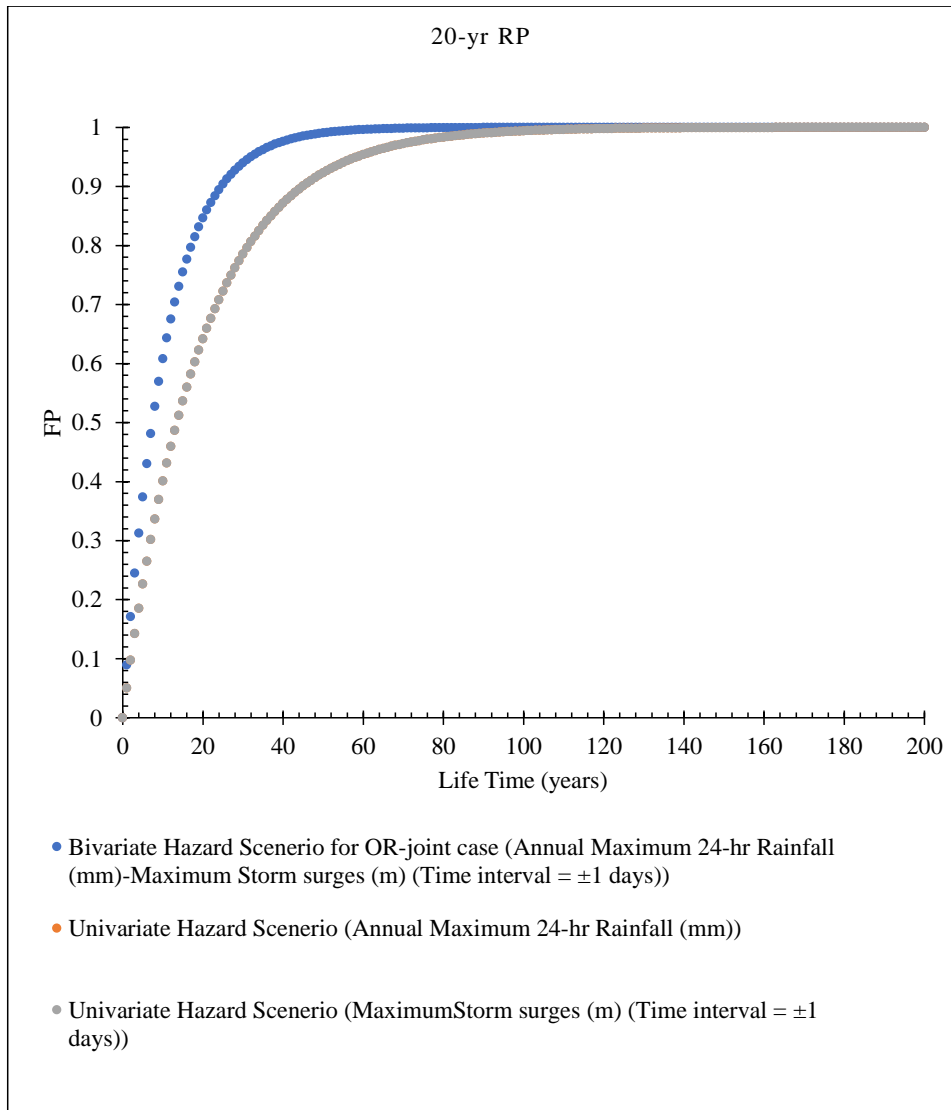

(e)

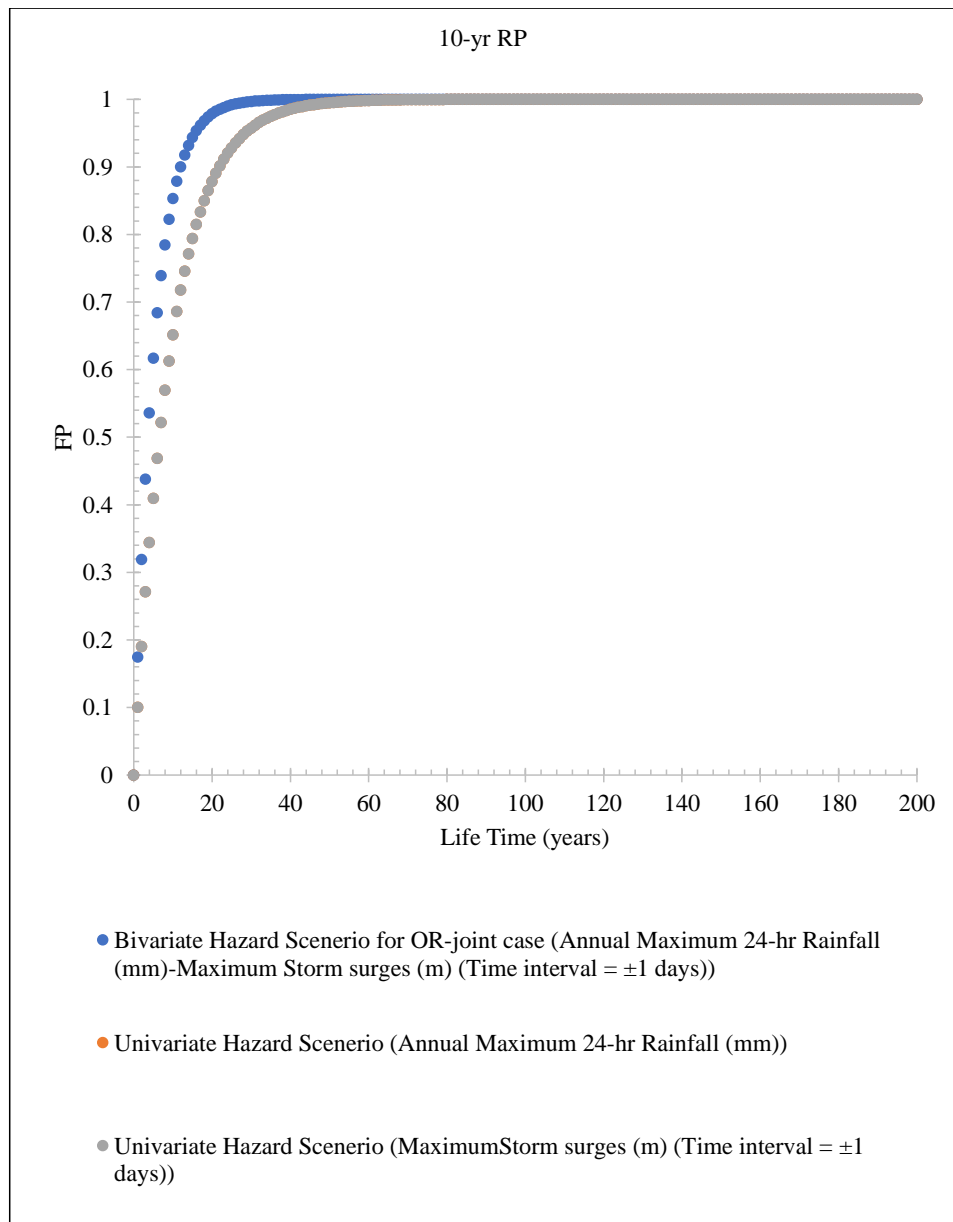

(f)

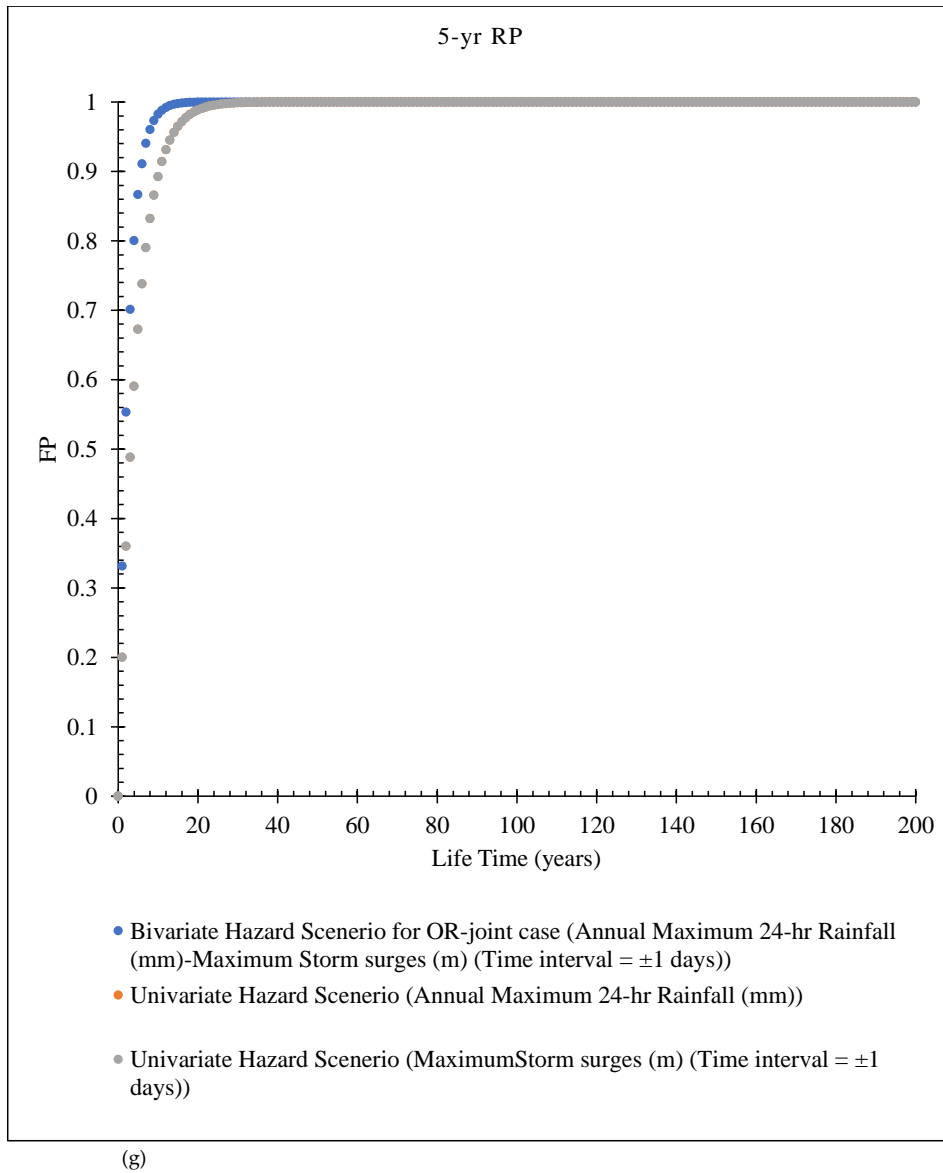

SF 15. Bivariate hydrologic risk of rainfall and storm surge observations estimated via OR-joint scenario for different return periods (a) 500-yr (b) 200-yr (c) 100-yr (d) 50-yr (e) 20-yr (f) 10-yr (g) 5-yr



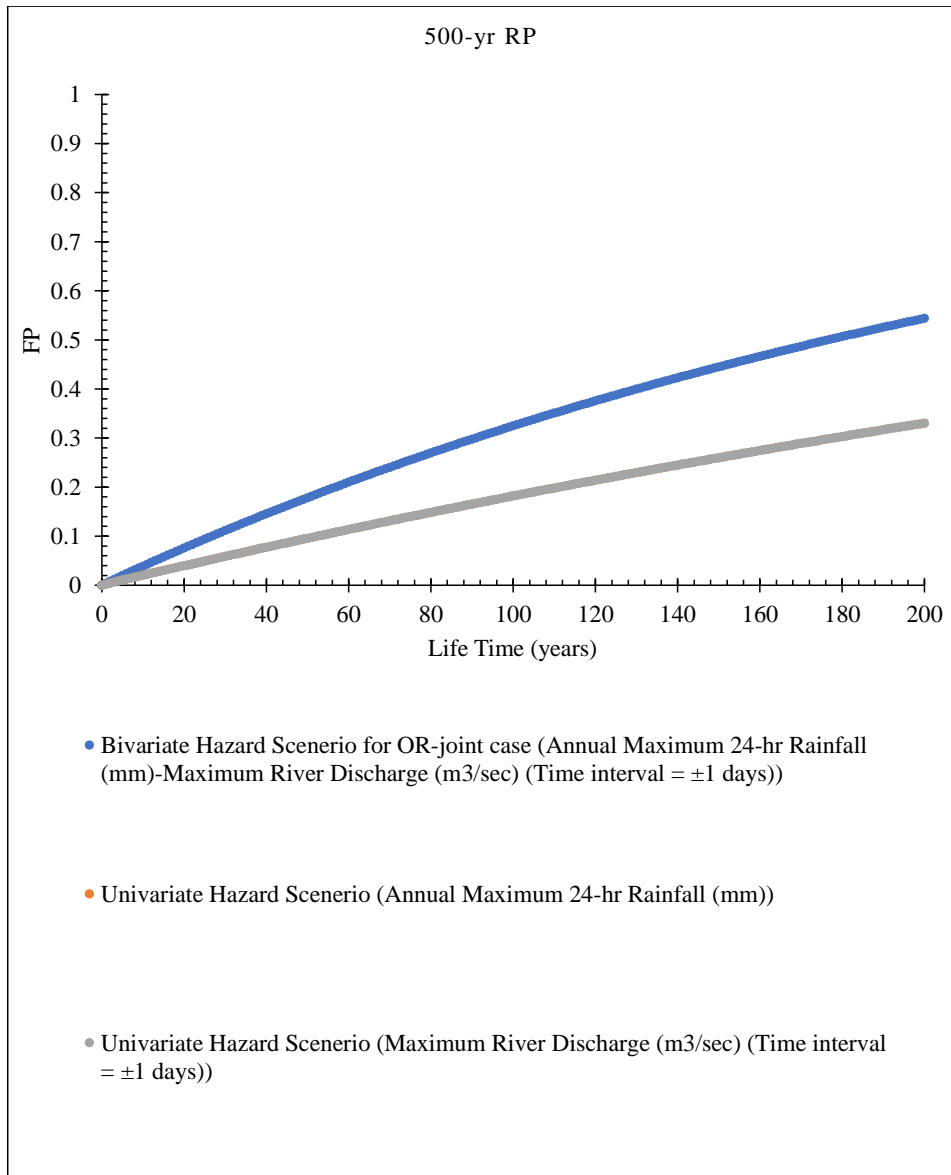

(a)

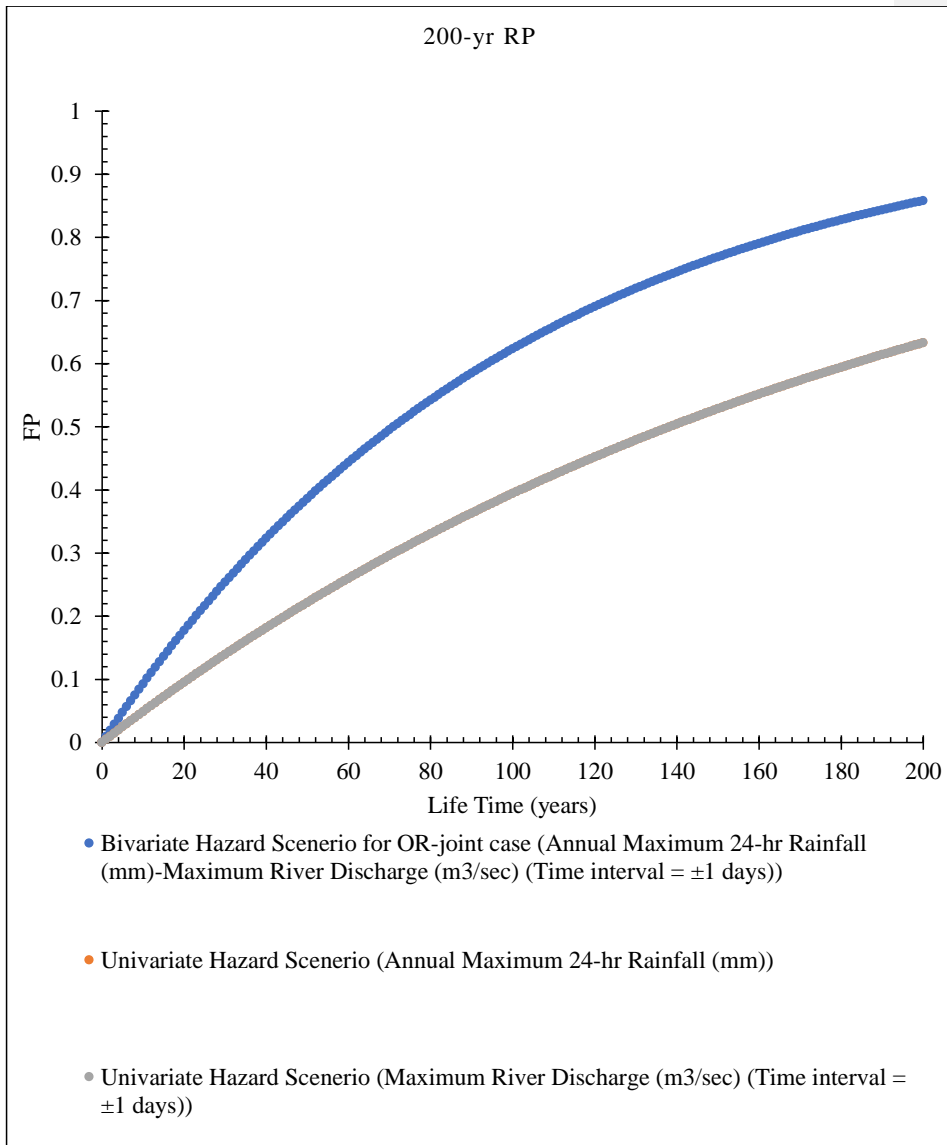

(b)

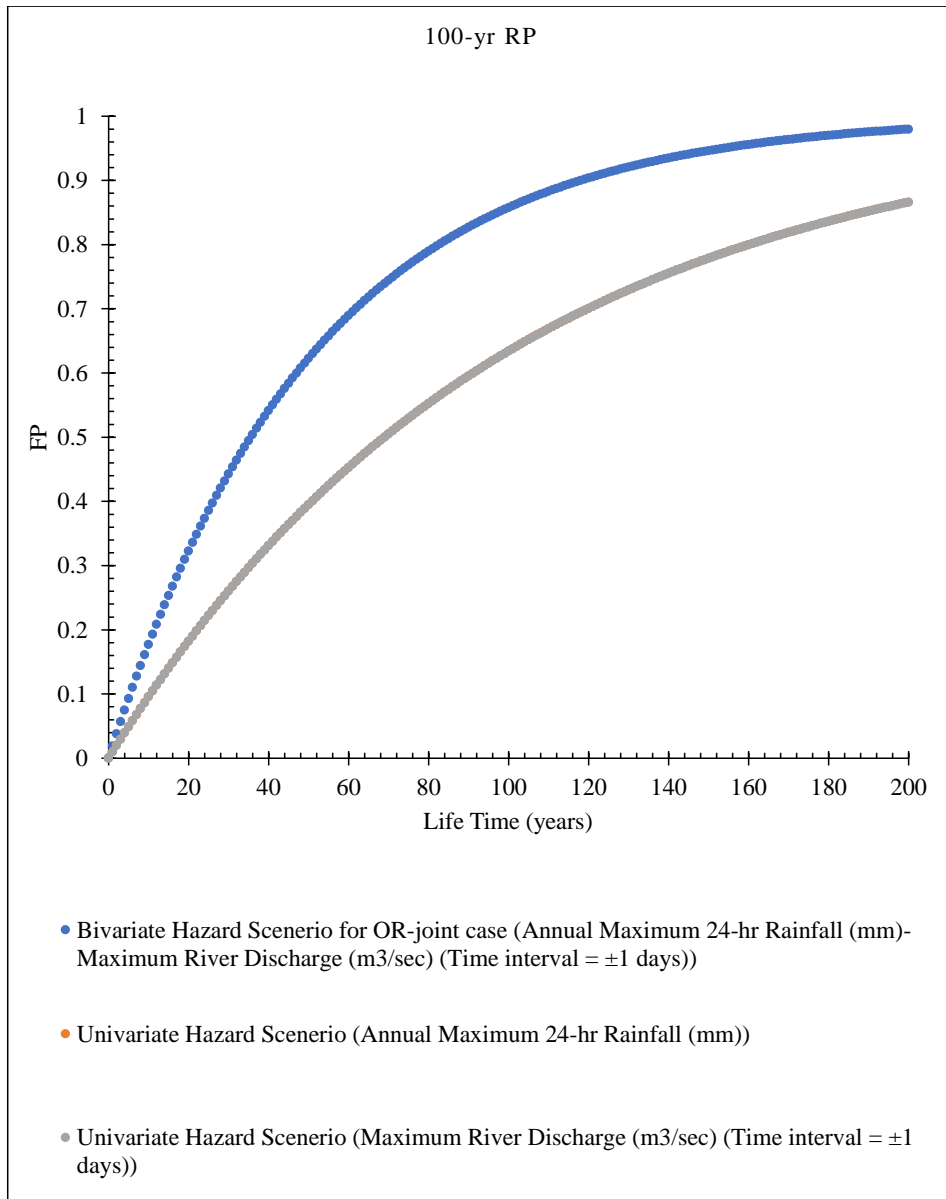

(c)

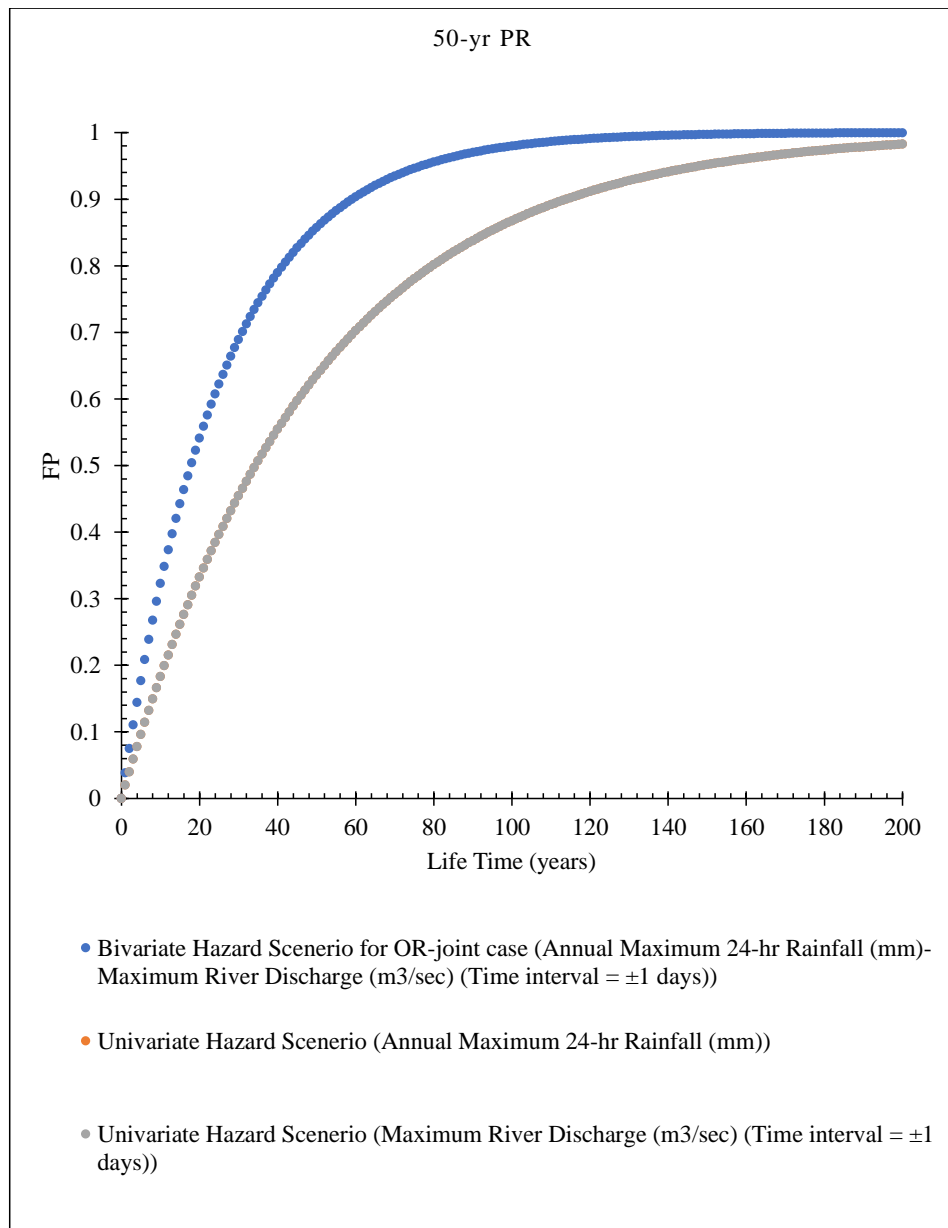

(d)

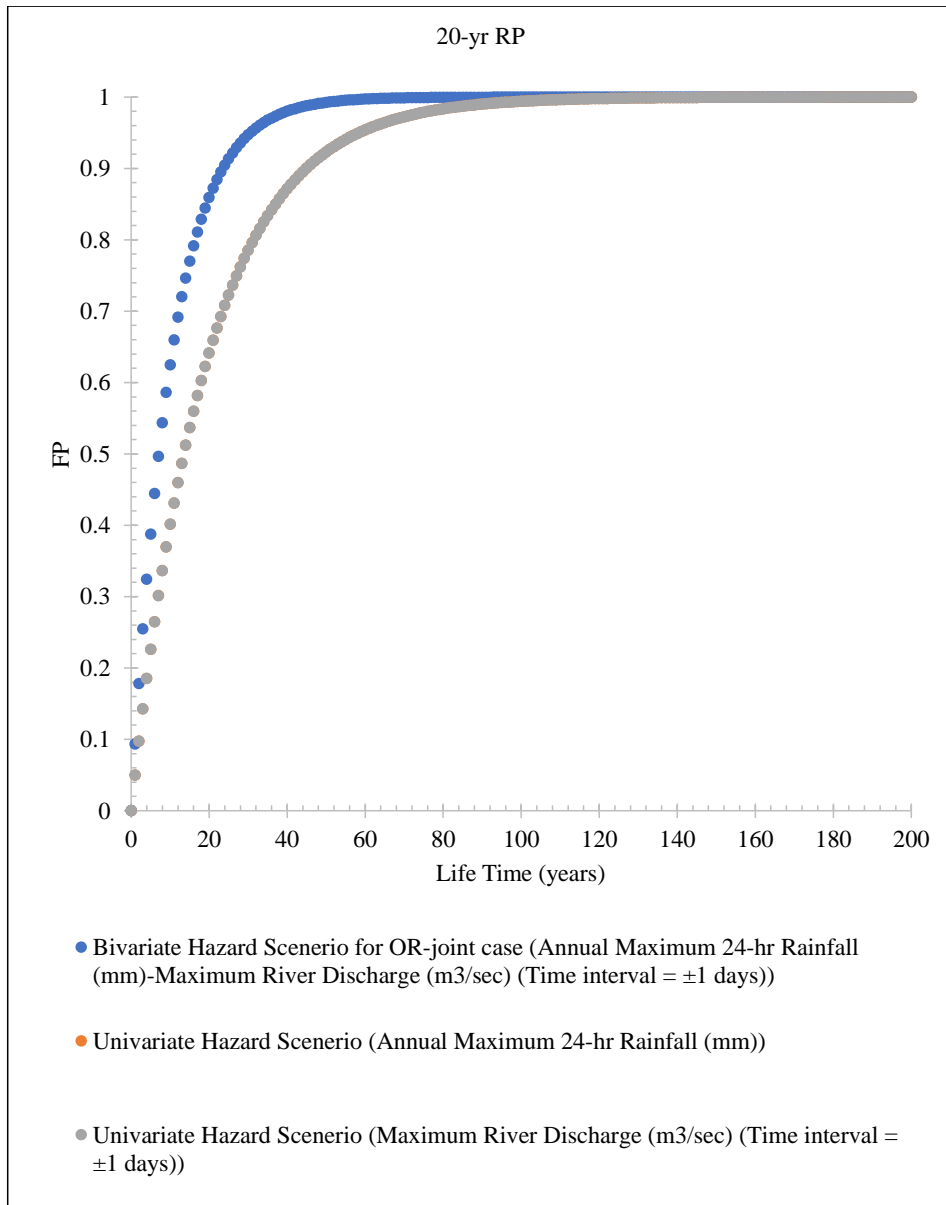

(e)

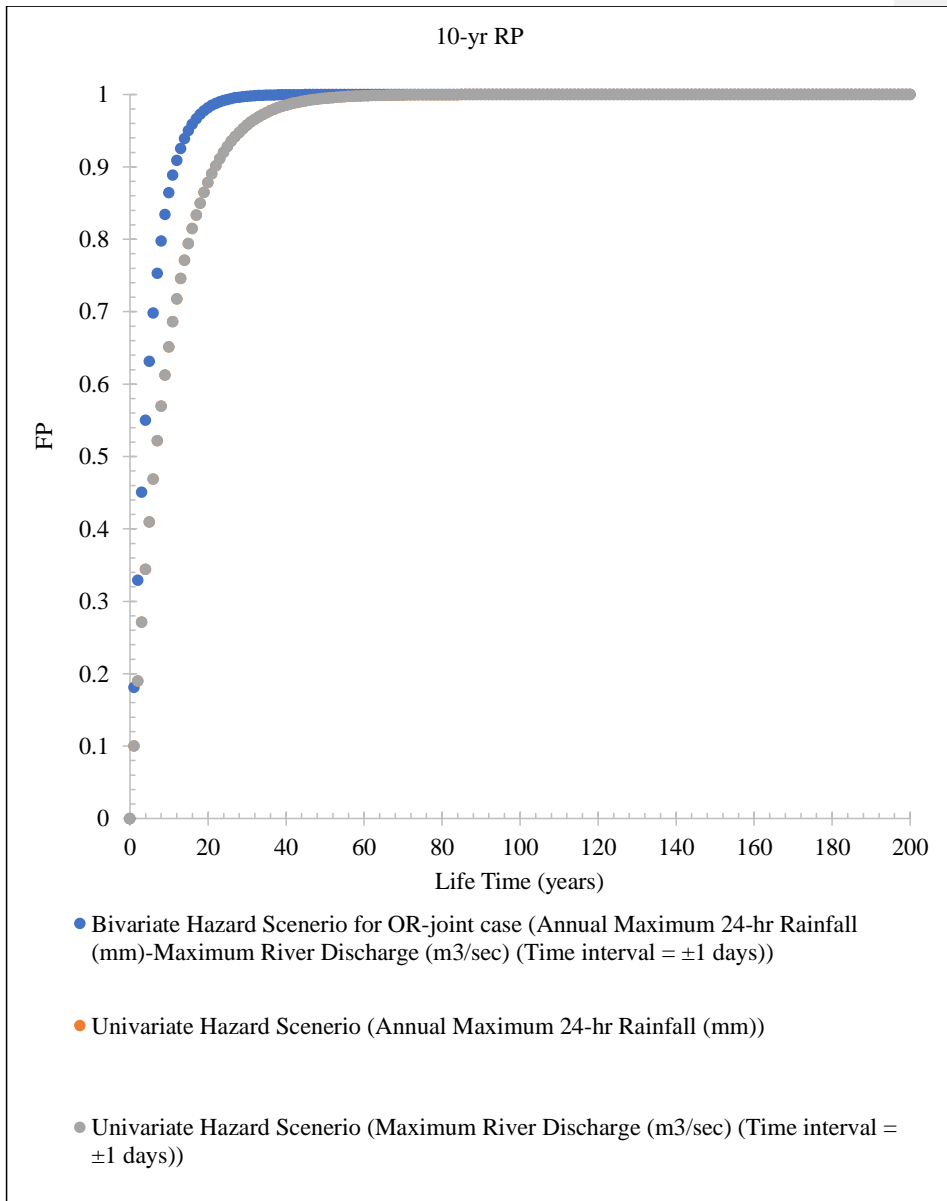

(f)

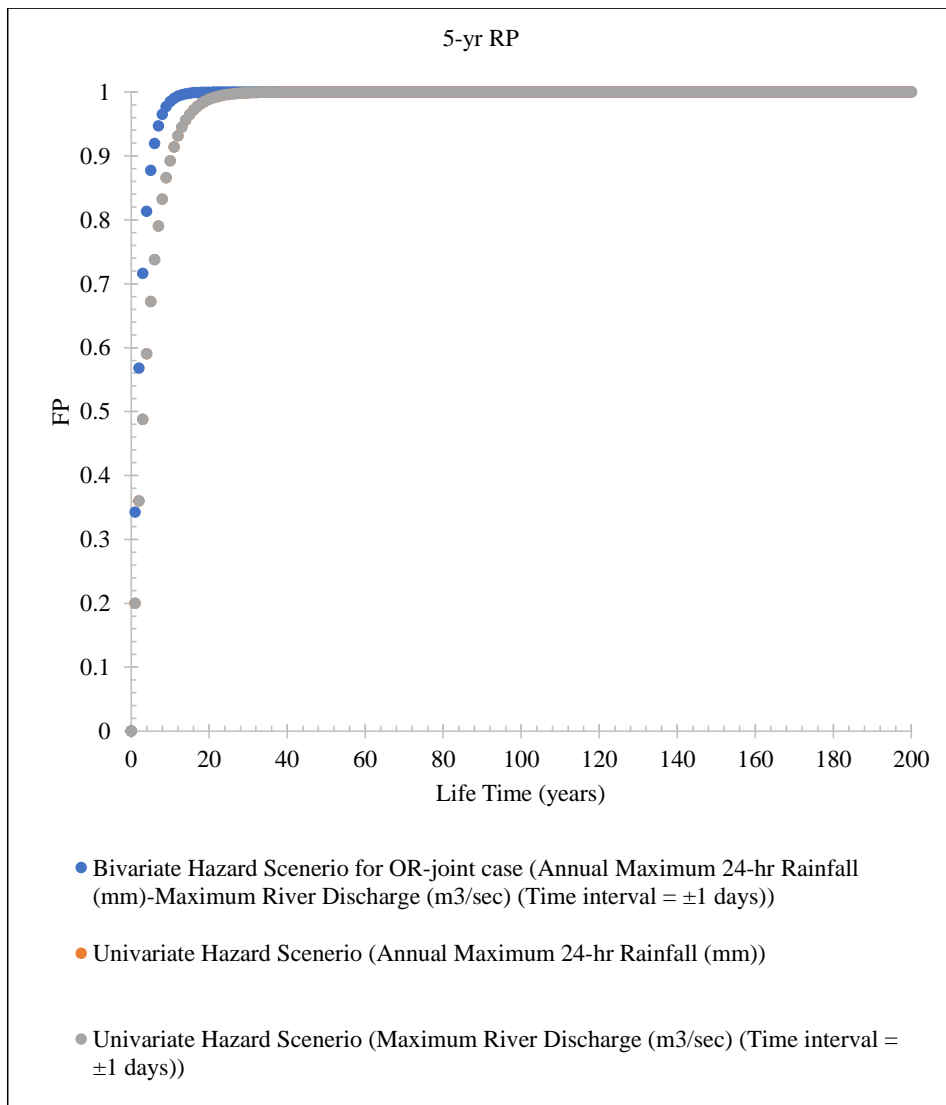

(g)

SF 16. Bivariate hydrologic risk of rainfall and river discharge observations estimated via OR-joint scenario for different return periods (a) 500-yr (b) 200-yr (c) 100-yr (d) 50-yr (e) 20-yr (f) 10-yr (g) 5-yr

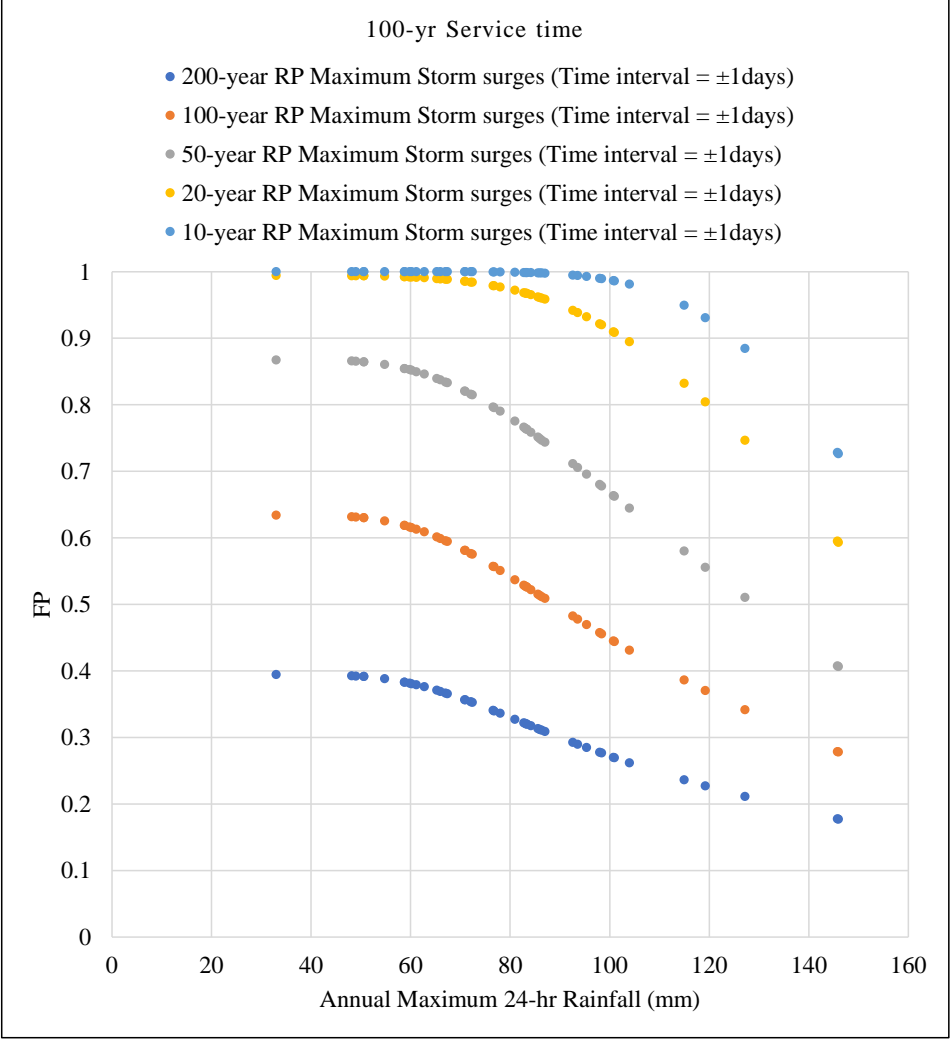

(a)



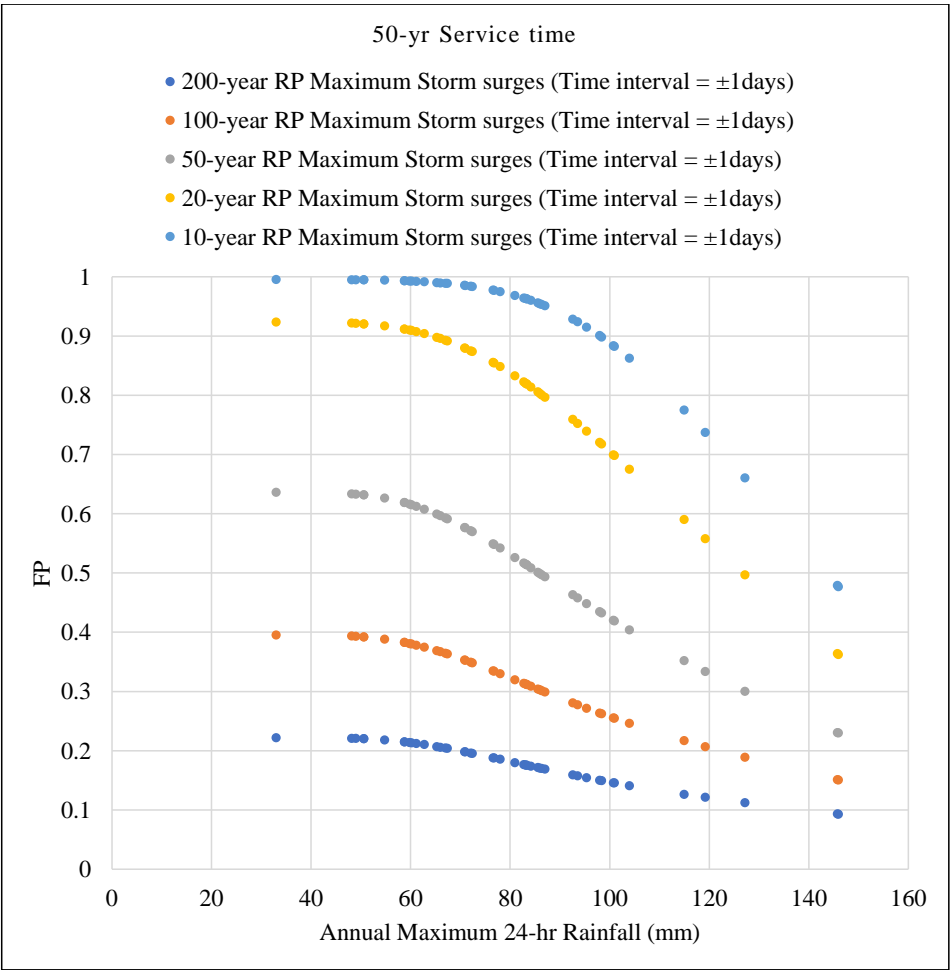

(b)

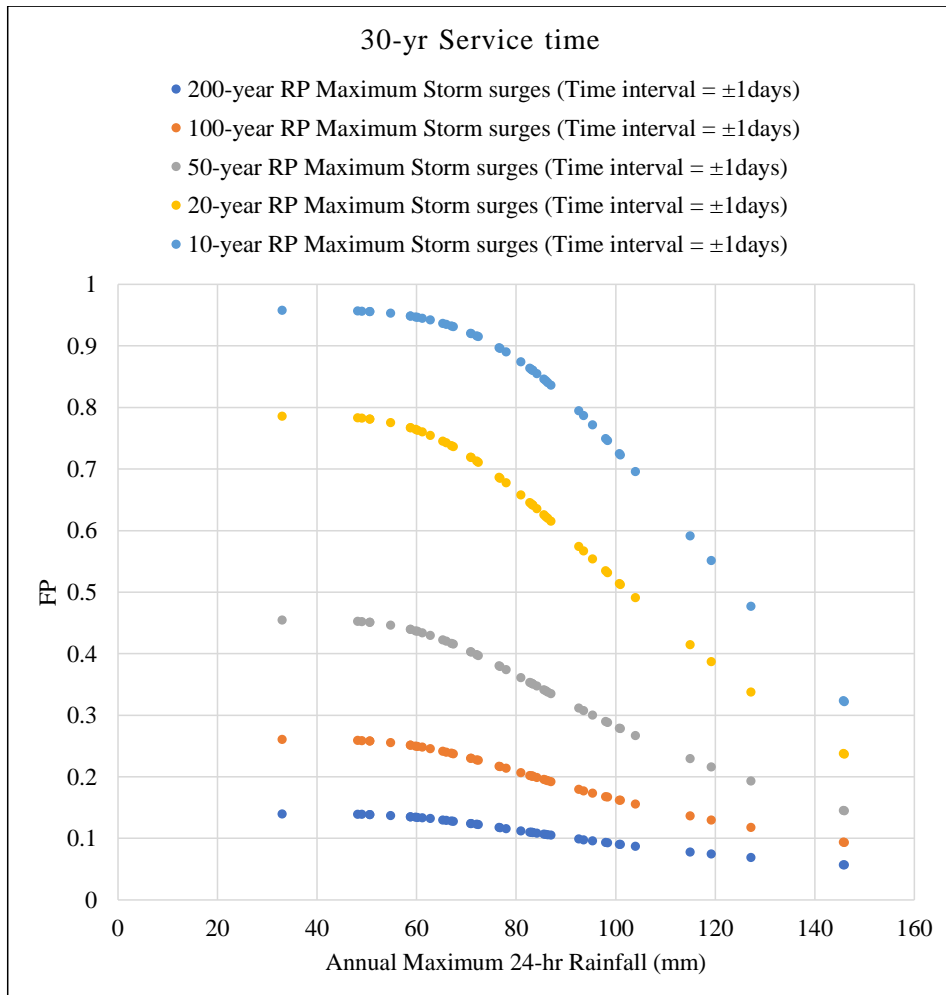

(c)

SF 14. Variation in the bivariate hydrologic risk for flood pair rainfall-storm surge for (a) service time = 100-years (b) Service time = 50-years (c) Service time = 30-years

### 100-yr Service time

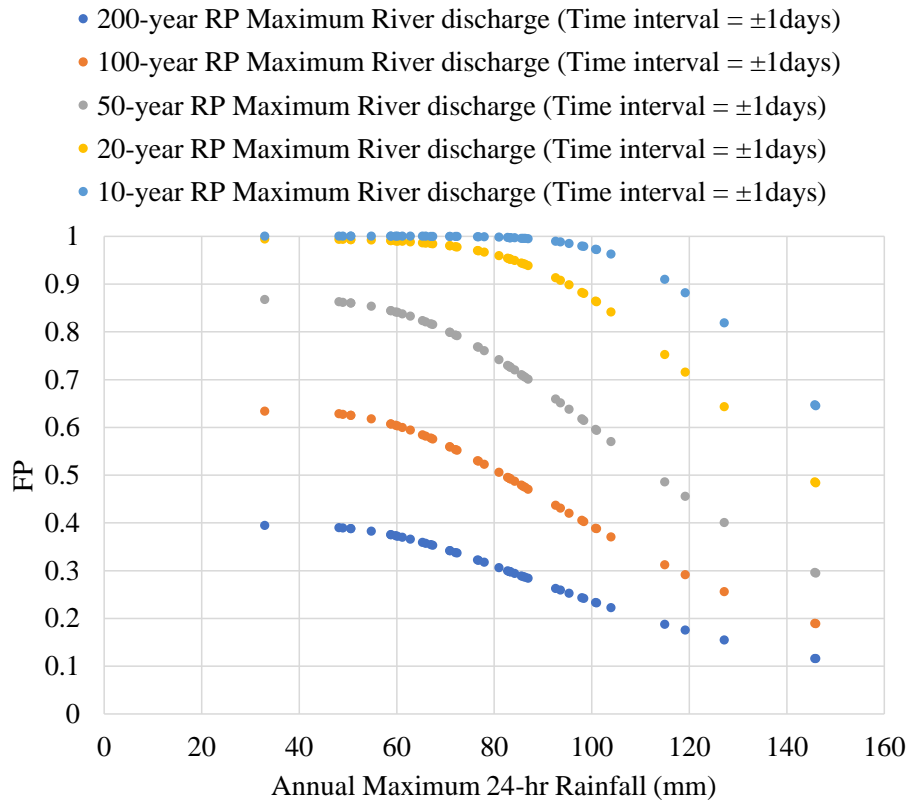

(a)

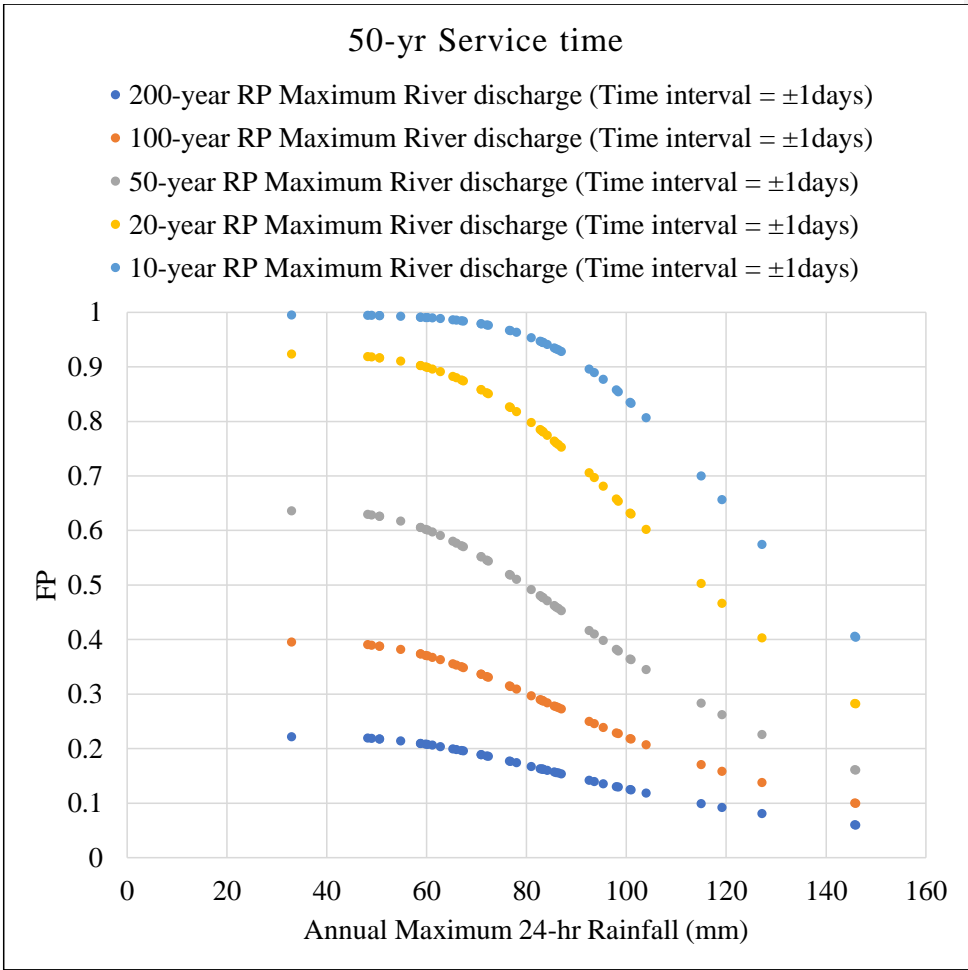

(b)

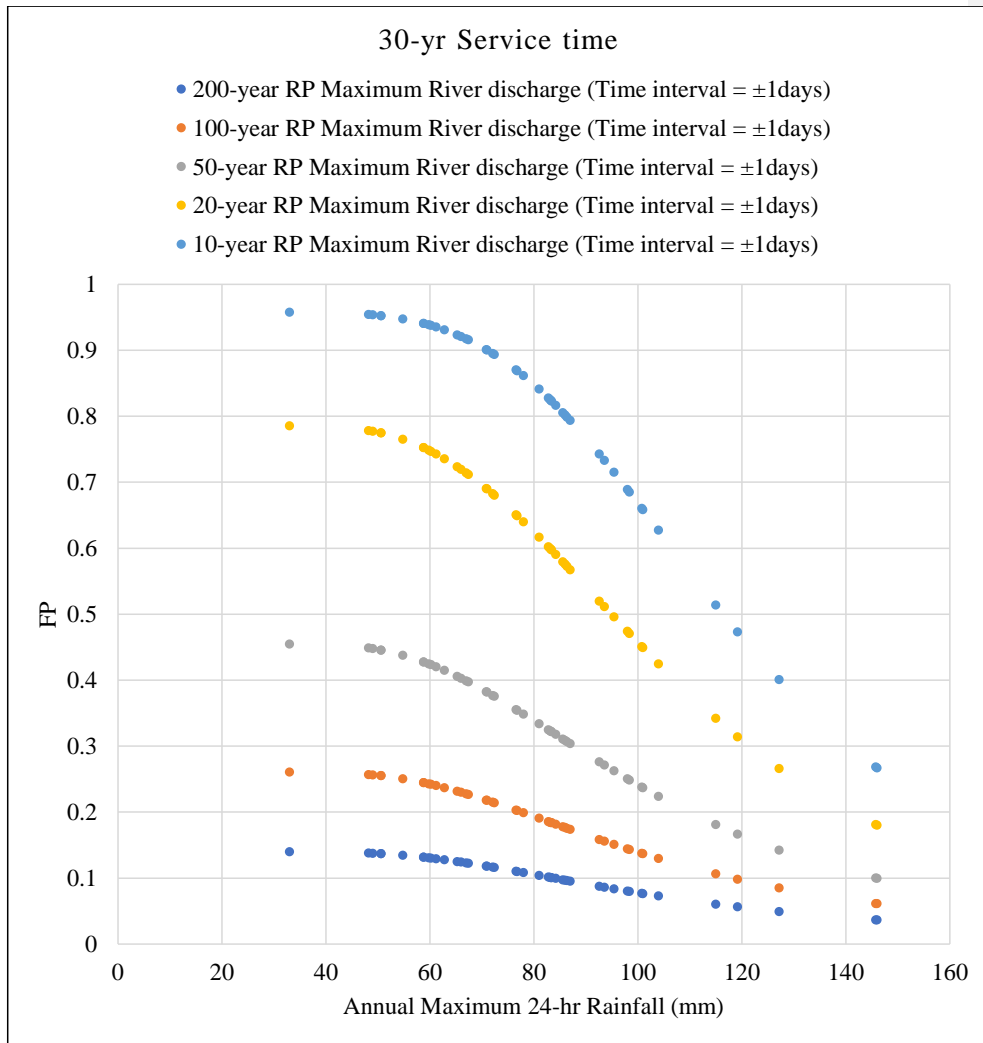

(c)

SF 15. Variation in the bivariate hydrologic risk for flood pair rainfall-river discharge for (a) service time = 100-years (b) Service time = 50-years (c) Service time = 30-years
